# Supplementary material for: Genome-wide analyses reveal a highly conserved Dengue virus envelope peptide which is critical for virus viability and antigenic in humans
Source: PubMed Central journal article supplement (PMC5090869; doi:10.1038/srep36339), 2016-11-02
Supplement: srep36339-s1.pdf [file srep36339-s1.pdf]

## Scientific Reports

### Genome-wide analyses reveal a highly conserved Dengue virus envelope peptide which is critical for virus viability and antigenic in humans

Renata C. Fleith, Francisco P. Lobo, Paula F. Santos, Mariana M. Rocha, Juliano Bordignon, Daisy M. Strottmann, Daniel O. Patricio, Wander R. Pavanelli, Maria Lo-Sarzi, Claudia N. D. Santos, Brian J. Ferguson, Daniel S. Mansur

## Supplementary Data:

### List of used sequence IDs

*Dengue virus* sequence Ids

AB189121.1  
AB189122.1  
AB189126.1  
AB189128.1  
AB214879.1  
AF022440.1  
AF119661.1  
AF169683.1  
AF226685.2  
AF298807.1  
AF326573.1  
AF489932.1  
AY145121.1  
AY496874.2  
AY618988.1  
AY618989.1  
AY618990.1  
AY618991.1  
AY618992.1  
AY618993.1  
AY676353.1  
AY702040.1  
AY732478.1  
AY732482.1  
AY762085.1  
AY835999.4  
AY858036.2  
AY858037.2  
AY858042.2  
AY876494.1  
AY923865.1  
AY947539.1

DQ181803.1  
DQ448231.2  
DQ672561.1  
DQ675522.1  
DQ675525.1  
EF032590.1  
EF457905.1  
EF457906.1  
EU081181.1  
EU081183.1  
EU081185.1  
EU081190.1  
EU081192.1  
EU081193.1  
EU081203.1  
EU081204.1  
EU081211.1  
EU081212.1  
EU081215.1  
EU081220.1  
EU081223.1  
EU081231.1  
EU081232.1  
EU081260.1  
EU081267.1  
EU482455.1  
EU482457.1  
EU482460.1  
EU482461.1  
EU482464.1  
EU482466.1  
EU482482.1  
EU482490.1  
EU482492.1  
EU482502.1  
EU482530.1  
EU482535.1  
EU482539.1  
EU482540.1  
EU482547.1  
EU482551.1  
EU482554.1  
EU482574.1  
EU482580.1  
EU482599.1  
EU482618.1  
EU482621.1  
EU482623.1  
EU482642.1  
EU482653.1  
EU482654.1  
EU482659.1  
EU482661.1  
EU482677.1  
EU482683.1  
EU482699.1

EU482700.1  
EU482708.1  
EU482710.1  
EU482711.1  
EU482727.1  
EU482734.1  
EU482753.1  
EU482755.1  
EU482757.1  
EU482769.1  
EU482786.1  
EU482794.1  
EU482800.1  
EU482803.1  
EU482827.1  
EU529693.1  
EU529694.1  
EU529699.1  
EU569690.1  
EU569695.1  
EU569706.1  
EU569708.1  
EU569717.1  
EU596493.1  
EU660395.1  
EU660400.1  
EU660420.1  
EU677147.1  
EU677154.1  
EU677160.1  
EU677174.1  
EU687220.1  
EU687222.1  
EU687230.1  
EU687232.1  
EU687233.1  
EU726772.1  
EU726773.1  
EU726779.1  
EU854295.1  
EU854296.1  
EU854297.1  
EU854299.1  
EU854300.1  
EU854301.1  
FJ024424.1  
FJ024436.1  
FJ024451.1  
FJ024458.1  
FJ024476.1  
FJ182008.1  
FJ182016.1  
FJ182017.1  
FJ182024.1  
FJ182030.1  
FJ182037.1

FJ226067.1  
FJ373302.1  
FJ390375.1  
FJ410174.1  
FJ410194.1  
FJ410202.1  
FJ410205.1  
FJ410211.1  
FJ410219.1  
FJ410230.1  
FJ410231.1  
FJ410237.1  
FJ410250.1  
FJ410258.1  
FJ410269.1  
FJ410272.1  
FJ410274.1  
FJ410285.1  
FJ410288.1  
FJ432721.1  
FJ432726.1  
FJ432728.1  
FJ432731.1  
FJ432736.1  
FJ432739.1  
FJ432742.1  
FJ432743.1  
FJ461311.1  
FJ461316.1  
FJ461334.1  
FJ461339.1  
FJ469909.1  
FJ547061.1  
FJ547072.1  
FJ547073.1  
FJ547075.1  
FJ547077.1  
FJ547082.1  
FJ562103.1  
FJ639693.1  
FJ639695.1  
FJ639697.1  
FJ639698.1  
FJ639712.1  
FJ639715.1  
FJ639716.1  
FJ639721.1  
FJ639726.1  
FJ639736.1  
FJ639737.1  
FJ639738.1  
FJ639739.1  
FJ639742.1  
FJ639744.1  
FJ639745.1  
FJ639748.1

FJ639751.1  
FJ639757.1  
FJ639762.1  
FJ639764.1  
FJ639769.1  
FJ639771.1  
FJ639773.1  
FJ639781.1  
FJ639795.1  
FJ639802.1  
FJ639805.1  
FJ639816.1  
FJ639826.1  
FJ639830.1  
FJ639834.1  
FJ644564.1  
FJ687437.1  
FJ687439.1  
FJ744700.1  
FJ744725.1  
FJ744728.1  
FJ744731.1  
FJ744738.1  
FJ744741.1  
FJ744745.1  
FJ810409.1  
FJ810417.1  
FJ850057.1  
FJ850058.1  
FJ850059.1  
FJ850065.1  
FJ850082.1  
FJ850094.1  
FJ850095.1  
FJ850098.1  
FJ850099.1  
FJ850103.1  
FJ873808.1  
FJ882535.1  
FJ882538.1  
FJ882548.1  
FJ882557.1  
FJ882560.1  
FJ882578.1  
FJ882580.1  
FJ882581.1  
FJ882582.1  
FJ882583.1  
FJ882584.1  
FJ882585.1  
FJ882586.1  
FJ882587.1  
FJ882588.1  
FJ882589.1  
FJ882590.1  
FJ882591.1

FJ882592.1  
FJ882595.1  
FJ882596.1  
FJ882597.1  
FJ882598.1  
FJ882599.1  
FJ882600.1  
FJ882601.1  
FJ898384.1  
FJ898386.1  
FJ898392.1  
FJ898433.1  
FJ898436.1  
FJ898451.1  
FJ898470.1  
FJ898473.1  
FJ898479.1  
FJ906963.1  
FJ906967.1  
FM210205.1  
FM210207.1  
FM210217.1  
FM210221.1  
FM210227.1  
FM210233.2  
FM210240.2  
FM210242.2  
FM210245.2  
GQ199773.1  
GQ199802.1  
GQ199824.1  
GQ199834.1  
GQ199862.1  
GQ199865.1  
GQ199874.1  
GQ199876.1  
GQ199878.1  
GQ199879.1  
GQ199880.1  
GQ199881.1  
GQ199882.1  
GQ199883.1  
GQ199884.1  
GQ199885.1  
GQ199891.1  
GQ252675.1  
GQ398256.1  
GQ398265.1  
GQ398268.1  
GQ398270.1  
GQ398281.1  
GQ398288.1  
GQ398299.1  
GQ398307.1  
GQ868498.1  
GQ868500.1

GQ868505.1  
GQ868528.1  
GQ868532.1  
GQ868539.1  
GQ868551.1  
GQ868554.1  
GQ868563.1  
GQ868574.1  
GQ868579.1  
GQ868580.1  
GQ868581.1  
GQ868582.1  
GQ868583.1  
GQ868584.1  
GQ868585.1  
GQ868590.1  
GQ868591.1  
GQ868594.1  
GQ868598.1  
GQ868617.1  
GQ868628.1  
GQ868630.1  
GQ868631.1  
GQ868636.1  
GQ868642.1  
GQ868643.1  
GQ868644.1  
GQ868645.1  
GU131693.1  
GU131696.1  
GU131727.1  
GU131735.1  
GU131757.1  
GU131764.1  
GU131772.1  
GU131777.1  
GU131780.1  
GU131788.1  
GU131794.1  
GU131814.1  
GU131836.1  
GU131841.1  
GU131846.1  
GU131848.1  
GU131855.1  
GU131856.1  
GU131857.1  
GU131865.1  
GU131874.1  
GU131883.1  
GU131896.1  
GU131898.1  
GU131901.1  
GU131902.1  
GU131906.1  
GU131912.1

GU131920.1  
GU131932.1  
GU131936.1  
GU131948.1  
GU131967.1  
GU131968.1  
GU131970.1  
GU289913.1  
GU363549.1  
HM181934.1  
HM181954.1  
HM181958.1  
HM181971.1  
HM181974.1  
HM181977.1  
HM181978.1  
HM582099.1  
HM582102.1  
HM582107.1  
HM582109.1  
HM582112.1  
HM582115.1  
HM631859.1  
HM756276.1  
HM756277.1  
HQ166031.1  
HQ332172.1  
HQ332173.1  
HQ332174.1  
HQ332175.1  
HQ332176.1  
HQ332181.1  
HQ541786.1  
HQ541795.1  
HQ541798.1  
HQ705610.1  
HQ705612.1  
HQ705622.1  
HQ705623.1  
HQ733861.1  
JF262779.1  
JF262780.1  
JF262781.1  
JF262782.1  
JF262783.1  
JF295012.1  
JF459993.1  
JF730044.1  
JF730054.1  
JF730055.1  
JF741967.1  
JF920402.1  
JF920406.1  
JF937604.1  
JF937605.1  
JF937615.1



JF937624.1  
JF937637.1  
JF937651.1  
JF937652.1  
JN000937.1  
JN406514.1  
JN559740.2  
JN559741.2  
JN638338.1  
JN638341.1  
JN638570.1  
JN638571.1  
JN638572.1  
JN697058.1  
JN697379.1  
JN819403.1  
JN819406.1  
JN819408.1  
JN819409.1  
JN983813.1  
JQ045688.1  
JQ513330.1  
JQ513331.1  
JQ513332.1  
JQ513333.1  
JQ513334.1  
JQ513335.1  
JQ513336.1  
JQ513337.1  
JQ513338.1  
JQ513339.1  
JQ513340.1  
JQ513341.1  
JQ513342.1  
JQ513343.1  
JQ513344.1  
JQ513345.1  
JQ822247.1  
JX024757.1  
JX024758.1  
JX079690.1  
JX669469.1  
JX669477.1  
JX669483.1  
JX669486.1  
JX669487.1  
JX669497.1  
JX669500.1  
JX669504.1  
KC333651.1  
KC692517  
KF954945  
NC\_001474.2  
NC\_001475.2  
NC\_001477.1  
NC\_002640.1

*Tick-borne encephalitis virus* sequence IDs

AB062063.2  
AB062064.1  
AB753012.1  
AF069066.1  
AY169390.3  
DQ401140.3  
DQ862460.1  
DQ989336.1  
EF469661.1  
EF469662.1  
EU816450.1  
EU816451.1  
EU816452.1  
EU816453.1  
EU816454.1  
EU816455.2  
FJ402885.1  
FJ402886.1  
FJ572210.1  
FJ906622.1  
FJ968751.1  
FJ997899.1  
GQ228395.1  
GQ266392.1  
GU121642.1  
GU183379.1  
GU183381.1  
GU183382.1  
GU183384.1  
HM120875.1  
HM535610.1  
HM535611.1  
HM859894.1  
HM859895.1  
HQ201303.1  
HQ901366.1  
HQ901367.1  
JF316707.1  
JF316708.1  
JF819648.2  
JN003205.1  
JN003206.1  
JN003207.1  
JN003208.1  
JN003209.1  
JN229223.1  
JQ650522.1  
JQ650523.1  
JQ825144.1  
JQ825145.1  
JQ825147.1

JQ825148.1  
JQ825149.1  
JQ825150.1  
JQ825152.1  
JQ825154.1  
JQ825155.1  
JQ825156.1  
JQ825158.1  
JQ825159.1  
JQ825160.1  
JQ825163.1  
JQ825164.1  
JX498939.1  
JX498940.1  
JX534167.1  
KC414090.1  
KC422663.2  
KC422667.2  
KC806252.1  
KC835595.1  
KC835596.1  
KC835597.1  
KF151173.1  
KF826915.1  
KF826916.1  
KF880803.1  
KF880804.1  
KF880805.1  
KF951037.1  
KF991107.1  
KJ000002.1  
KJ626343.1  
KJ633033.1  
KJ701416.1  
KJ739729.1  
KJ739730.1  
KJ739731.1  
KJ755186.1  
KJ914682.1  
KJ914683.1  
KJ922512.1  
KJ922513.1  
KJ922514.1  
KJ922515.1  
KJ922516.1  
KM019545.1  
KM019546.1  
KP331441.1  
KP331442.1  
KP331443.1  
KP345889.1  
KP644245.1  
KP844724.1  
KP844725.1  
KP844726.1  
KP844727.1

KP869172.1  
KP938507.1  
KT001070.1  
KT001071.1  
KT001072.1  
KT001073.1  
KT224352.1  
KT224353.1  
LC017691.1  
LC017692.1  
LC017693.1  
NC\_001672.1  
U27495.1

*West Nile virus* sequence IDs

KJ501450.1  
AF404754.1  
AF404755.1  
AY712946.1  
AY712947.1  
DQ164191.1  
DQ164199.1  
DQ164206.1  
DQ377179.1  
DQ411029.1  
DQ666448.1  
EF429200.1  
EF530047.1  
FJ151394.1  
HM051416.1  
HM488127.1  
HM488130.1  
HM488134.1  
HM488147.1  
HM488151.1  
HM488154.1  
HM488186.1  
HM488187.1  
HM488189.1  
HM488191.1  
HM488193.1  
HM488201.1  
HM488212.1  
HM488217.1  
HM488219.1  
HM488228.1  
HM488231.1  
HM488234.1  
HM488237.1  
HM488244.1  
HM488248.1  
HM488249.1  
HM756656.1

HM756657.1  
HM756658.1  
HM756671.1  
HQ671670.1  
HQ671675.1  
HQ671689.1  
HQ671695.1  
HQ671701.1  
HQ671723.1  
HQ671726.1  
HQ705673.1  
HQ891012.1  
JF415930.1  
JF719066.1  
JF920306.1  
JF920728.1  
JF920732.1  
JF920736.1  
JF920737.1  
JF920739.1  
JF920745.1  
JF920749.1  
JF957164.1  
JF957179.1  
JF957184.1  
JF957185.1  
JF972636.1  
JN819320.1  
JN819323.1  
JX041631.1  
JX041632.1  
JX123031.1  
JX556213.1  
KC736489.1  
KC736499.1  
KC736500.1  
KF647248.1  
KJ501108.1  
KJ501114.1  
KJ501123.1  
KJ501126.1  
KJ501131.1  
KJ501133.1  
KJ501135.1  
KJ501146.1  
KJ501170.1  
KJ501214.1  
KJ501229.1  
KJ501257.1  
KJ501258.1  
KJ501277.1  
KJ501290.1  
KJ501299.1  
KJ501300.1  
KJ501302.1  
KJ501303.1

KJ501305.1  
KJ501306.1  
KJ501309.1  
KJ501321.1  
KJ501339.1  
KJ501346.1  
KJ501355.1  
KJ501376.1  
KJ501393.1  
KJ501411.1  
KJ501422.1  
KJ501428.1  
KJ501443.1  
KJ501451.1  
KJ501460.1  
KJ501463.1  
KJ501464.1  
KJ501477.1  
KJ501480.1  
KJ501484.1  
KJ501495.1  
KJ501511.1  
KJ501520.1  
KJ501526.1  
KJ786936.1  
M12294.2

*Japanese encephalitis virus*

AY303791.1  
FJ495189.1  
KT957423.1  
L48961.1  
AF221499.1  
KT957420.1  
KC196115.1  
JX131374.1  
GQ902063.1  
GQ902062.1  
GQ902060.1  
GQ902059.1  
GU187972.1  
AF045551.2  
KT957422.1  
KR265316.1  
JX050179.1  
AY303796.1  
AY303793.1  
AY303792.1  
EF623988.1  
EF623987.1  
GU556217.1  
EU693899.1  
AY585242.1

EU880214.1  
AF315119.1  
EF623989.1  
EF107523.1  
KT229574.1  
KF297916.1  
KF297915.1  
AY303798.1  
AY303795.1  
JQ086763.1  
JF499790.1  
JF499789.1  
HQ893545.1  
JF706285.1  
JF706281.1  
JF706282.1  
JF706283.1  
JF706284.1  
JF706280.1  
JF706279.1  
JF706278.1  
JF706277.1  
JF706276.1  
JF706275.1  
JF706274.1  
JF706273.1  
JF706272.1  
JF706270.1  
JF706269.1  
JF706268.1  
JF706267.1  
JN381873.1  
JN381872.1  
JN381871.1  
JN381870.1  
JN381869.1  
JN381868.1  
JN381867.1  
JN381866.1  
JN381865.1  
JN381864.1  
JN381863.1  
JN381861.1  
JN381862.1  
JN381860.1  
JN381859.1  
JN381858.1  
JN381857.1  
JN381856.1  
JN381855.1  
JN381854.1  
JN381853.1  
JN381851.1  
JN381852.1  
JN381850.1  
JN381849.1

JN381847.1  
JN381848.1  
JN381846.1  
JN381844.1  
JN381845.1  
JN381843.1  
JN381842.1  
JN381839.1  
JN381840.1  
JN381841.1  
JN381838.1  
JN381837.1  
JN381836.1  
JN381835.1  
JN381834.1  
JN381833.1  
JN381832.1  
JF915894.1  
JN381830.1  
JN381831.1  
HM596272.1  
AF098735.1  
AF098737.1  
AF069076.1  
AY316157.1  
U47032.1  
GQ918133.2  
JN711458.1  
JN711459.1  
JQ031753.1  
KC915016.1  
KF907505.1  
KM677246.1  
AF254452.1  
AF254453.1  
FJ185036.1  
EU429297.1  
GU205163.1  
EF543861.1

*Yellow fever virus* sequence IDs

AF052437.1  
AF052438.1  
AF052439.1  
AF052444.1  
AF052445.1  
AF052446.1  
AF094612.1  
AY572535.1  
AY603338.1  
AY640589.1  
AY968064.1  
AY968065.1



DQ100292.1  
DQ118157.1  
DQ235229.1  
FJ654700.1  
GQ379162.1  
GQ379163.1  
HM582851.1  
JF912179.1  
JF912180.1  
JF912181.1  
JF912182.1  
JF912183.1  
JF912184.1  
JF912185.1  
JF912186.1  
JF912187.1  
JF912188.1  
JF912189.1  
JF912190.1  
JN620362.1  
JN628279.1  
JN628280.1  
JN628281.1  
JN811140.1  
JN811141.1  
JN811142.1  
JN811143.1  
JX503529.1  
JX898868.1  
JX898869.1  
JX898870.1  
JX898871.1  
JX898872.1  
JX898873.1  
JX898874.1  
JX898875.1  
JX898876.1  
JX898877.1  
JX898878.1  
JX898879.1  
JX898880.1  
JX898881.1  
JX949181.1  
KF769015.1  
KF769016.1  
KF907504.1  
KM388814.1  
KM388815.1  
KM388816.1  
KM388817.1  
KM388818.1  
NC\_002031.1  
U17066.1  
U17067.1  
U21055.1  
U21056.1

U54798.1  
X03700.1

*Zika virus*

KU955595.1  
KU955594.1  
KU955593.1  
KU955592.1  
KU955591.1  
KX056898.1  
KU866423.1  
KU681081.3  
KU681082.3  
KU321639.1  
KX117076.1  
KU509998.3  
KU870645.1  
KU926310.1  
KU926309.1  
KU922960.1  
KU922923.1  
KU820898.1  
KU744693.1  
KU853012.1  
KU853013.1  
KU740184.2  
KU497555.1  
KU707826.1  
KU527068.1  
KU501215.1  
KU647676.1  
LC002520.1  
KJ776791.1  
KX087102.1  
KX051563.1  
KX087101.1  
KU963796.1  
KU991811.1  
KU820899.2  
KU729217.2  
KU720415.1  
KU761564.1  
KU729218.1  
KU365779.1  
NC\_012532.1  
KU501217.1  
KU501216.1  
KU365780.1  
KU365778.1  
KU365777.1  
KU312312.1  
KF383119.1  
KF383118.1

EU545988.1  
AY632535.2  
KF383115.1  
KF383116.1  
KF383117.1  
KU955590.1  
KU955589.1  
KU963574.1  
KU963573.1  
KU820897.1  
KF268950.1  
KF268949.1  
KF268948.1  
DQ859059.1

## Supplementary Table:

### Mean conservation profile for all peptides of length 20, computed for the 480 DENV aligned polyproteins.

To generate this Supplementary Table was used a sliding window algorithm to compute mean conservation profile values for all peptides of length 20 across the alignment of the 480 DENV polyproteins, and sorted peptides based on mean conservation scores.

| START | END  | AVERAGE_CONSERVATION_PROFILE |
|-------|------|------------------------------|
| 2837  | 2857 | 0.9999                       |
| 2835  | 2855 | 0.9999                       |
| 2836  | 2856 | 0.9999                       |
| 2362  | 2382 | 0.9998                       |
| 2366  | 2386 | 0.9880                       |
| 2367  | 2387 | 0.9880                       |
| 2368  | 2388 | 0.9880                       |
| 2371  | 2391 | 0.9880                       |
| 2369  | 2389 | 0.9880                       |
| 2370  | 2390 | 0.9880                       |
| 2365  | 2385 | 0.9880                       |
| 2372  | 2392 | 0.9880                       |
| 2364  | 2384 | 0.9879                       |
| 2363  | 2383 | 0.9879                       |
| 2374  | 2394 | 0.9877                       |
| 2373  | 2393 | 0.9877                       |
| 2375  | 2395 | 0.9877                       |
| 2376  | 2396 | 0.9876                       |
| 2457  | 2477 | 0.9875                       |
| 2458  | 2478 | 0.9875                       |
| 2838  | 2858 | 0.9874                       |
| 2945  | 2965 | 0.9874                       |
| 2944  | 2964 | 0.9874                       |
| 2943  | 2963 | 0.9874                       |
| 2961  | 2981 | 0.9873                       |
| 2951  | 2971 | 0.9873                       |
| 2952  | 2972 | 0.9873                       |
| 2947  | 2967 | 0.9873                       |
| 2956  | 2976 | 0.9873                       |
| 2948  | 2968 | 0.9873                       |
| 2962  | 2982 | 0.9873                       |
| 2459  | 2479 | 0.9873                       |
| 2965  | 2985 | 0.9873                       |
| 2946  | 2966 | 0.9873                       |
| 2953  | 2973 | 0.9873                       |
| 2954  | 2974 | 0.9873                       |
| 2949  | 2969 | 0.9873                       |
| 2950  | 2970 | 0.9873                       |
| 2963  | 2983 | 0.9873                       |
| 2964  | 2984 | 0.9873                       |

|      |      |        |
|------|------|--------|
| 2460 | 2480 | 0.9872 |
| 2955 | 2975 | 0.9872 |
| 2461 | 2481 | 0.9872 |
| 1727 | 1747 | 0.9772 |
| 1726 | 1746 | 0.9772 |
| 1728 | 1748 | 0.9772 |
| 2968 | 2988 | 0.9749 |
| 2971 | 2991 | 0.9749 |
| 1963 | 1983 | 0.9749 |
| 2969 | 2989 | 0.9749 |
| 1962 | 1982 | 0.9749 |
| 2967 | 2987 | 0.9749 |
| 2972 | 2992 | 0.9749 |
| 2970 | 2990 | 0.9749 |
| 2966 | 2986 | 0.9749 |
| 2958 | 2978 | 0.9748 |
| 2833 | 2853 | 0.9748 |
| 2834 | 2854 | 0.9748 |
| 2957 | 2977 | 0.9748 |
| 2361 | 2381 | 0.9748 |
| 2960 | 2980 | 0.9748 |
| 2959 | 2979 | 0.9748 |
| 2463 | 2483 | 0.9747 |
| 2462 | 2482 | 0.9747 |
| 2464 | 2484 | 0.9746 |
| 2832 | 2852 | 0.9746 |
| 2831 | 2851 | 0.9746 |
| 1692 | 1712 | 0.9745 |
| 1834 | 1854 | 0.9745 |
| 1833 | 1853 | 0.9744 |
| 1832 | 1852 | 0.9744 |
| 3286 | 3306 | 0.9741 |
| 3285 | 3305 | 0.9741 |
| 3284 | 3304 | 0.9741 |
| 3231 | 3251 | 0.9736 |
| 3232 | 3252 | 0.9736 |
| 2808 | 2828 | 0.9714 |
| 2830 | 2850 | 0.9698 |
| 2829 | 2849 | 0.9698 |
| 2977 | 2997 | 0.9696 |
| 1760 | 1780 | 0.9657 |
| 1761 | 1781 | 0.9657 |
| 1759 | 1779 | 0.9657 |
| 1729 | 1749 | 0.9647 |
| 1725 | 1745 | 0.9644 |
| 3083 | 3103 | 0.9641 |
| 3082 | 3102 | 0.9641 |
| 3084 | 3104 | 0.9641 |
| 3085 | 3105 | 0.9641 |
| 2973 | 2993 | 0.9630 |
| 2974 | 2994 | 0.9629 |
| 529  | 549  | 0.9628 |
| 2377 | 2397 | 0.9626 |
| 3332 | 3352 | 0.9625 |
| 2456 | 2476 | 0.9625 |
| 2454 | 2474 | 0.9625 |

|      |      |        |
|------|------|--------|
| 2455 | 2475 | 0.9625 |
| 2942 | 2962 | 0.9624 |
| 1961 | 1981 | 0.9624 |
| 1771 | 1791 | 0.9624 |
| 1960 | 1980 | 0.9624 |
| 1776 | 1796 | 0.9623 |
| 3333 | 3353 | 0.9623 |
| 1773 | 1793 | 0.9623 |
| 1958 | 1978 | 0.9623 |
| 3336 | 3356 | 0.9623 |
| 1774 | 1794 | 0.9623 |
| 1775 | 1795 | 0.9623 |
| 3335 | 3355 | 0.9623 |
| 1772 | 1792 | 0.9623 |
| 1777 | 1797 | 0.9623 |
| 1959 | 1979 | 0.9623 |
| 1957 | 1977 | 0.9623 |
| 3334 | 3354 | 0.9623 |
| 1685 | 1705 | 0.9623 |
| 3260 | 3280 | 0.9622 |
| 3222 | 3242 | 0.9622 |
| 3220 | 3240 | 0.9622 |
| 3221 | 3241 | 0.9622 |
| 3259 | 3279 | 0.9622 |
| 2003 | 2023 | 0.9622 |
| 3224 | 3244 | 0.9621 |
| 3223 | 3243 | 0.9621 |
| 1837 | 1857 | 0.9620 |
| 1835 | 1855 | 0.9620 |
| 1897 | 1917 | 0.9620 |
| 1836 | 1856 | 0.9620 |
| 1898 | 1918 | 0.9620 |
| 1684 | 1704 | 0.9618 |
| 3176 | 3196 | 0.9618 |
| 1907 | 1927 | 0.9617 |
| 1900 | 1920 | 0.9617 |
| 1901 | 1921 | 0.9617 |
| 1902 | 1922 | 0.9617 |
| 1899 | 1919 | 0.9617 |
| 1903 | 1923 | 0.9617 |
| 1906 | 1926 | 0.9617 |
| 1683 | 1703 | 0.9614 |
| 1735 | 1755 | 0.9612 |
| 1731 | 1751 | 0.9612 |
| 1732 | 1752 | 0.9612 |
| 1736 | 1756 | 0.9612 |
| 3226 | 3246 | 0.9612 |
| 3230 | 3250 | 0.9612 |
| 1733 | 1753 | 0.9612 |
| 3229 | 3249 | 0.9612 |
| 1734 | 1754 | 0.9612 |
| 3227 | 3247 | 0.9612 |
| 3228 | 3248 | 0.9612 |
| 3237 | 3257 | 0.9611 |
| 3236 | 3256 | 0.9611 |
| 3238 | 3258 | 0.9611 |

|      |      |        |
|------|------|--------|
| 1851 | 1871 | 0.9604 |
| 1850 | 1870 | 0.9604 |
| 1847 | 1867 | 0.9604 |
| 1848 | 1868 | 0.9604 |
| 1846 | 1866 | 0.9603 |
| 1845 | 1865 | 0.9603 |
| 1844 | 1864 | 0.9603 |
| 2807 | 2827 | 0.9592 |
| 2975 | 2995 | 0.9571 |
| 2976 | 2996 | 0.9571 |
| 2987 | 3007 | 0.9569 |
| 2986 | 3006 | 0.9569 |
| 3251 | 3271 | 0.9558 |
| 3249 | 3269 | 0.9557 |
| 3245 | 3265 | 0.9557 |
| 3248 | 3268 | 0.9557 |
| 3250 | 3270 | 0.9557 |
| 3247 | 3267 | 0.9557 |
| 3246 | 3266 | 0.9557 |
| 3283 | 3303 | 0.9556 |
| 3282 | 3302 | 0.9555 |
| 1724 | 1744 | 0.9545 |
| 2359 | 2379 | 0.9540 |
| 2360 | 2380 | 0.9539 |
| 1758 | 1778 | 0.9531 |
| 1883 | 1903 | 0.9523 |
| 1757 | 1777 | 0.9523 |
| 1884 | 1904 | 0.9523 |
| 1885 | 1905 | 0.9523 |
| 1882 | 1902 | 0.9523 |
| 1750 | 1770 | 0.9523 |
| 1881 | 1901 | 0.9522 |
| 2839 | 2859 | 0.9522 |
| 1876 | 1896 | 0.9519 |
| 3080 | 3100 | 0.9519 |
| 3150 | 3170 | 0.9519 |
| 3149 | 3169 | 0.9519 |
| 3081 | 3101 | 0.9519 |
| 2993 | 3013 | 0.9514 |
| 1730 | 1750 | 0.9510 |
| 1966 | 1986 | 0.9507 |
| 530  | 550  | 0.9503 |
| 531  | 551  | 0.9502 |
| 1964 | 1984 | 0.9500 |
| 1691 | 1711 | 0.9499 |
| 2940 | 2960 | 0.9499 |
| 1689 | 1709 | 0.9499 |
| 1690 | 1710 | 0.9499 |
| 1688 | 1708 | 0.9499 |
| 3219 | 3239 | 0.9499 |
| 1770 | 1790 | 0.9499 |
| 2939 | 2959 | 0.9498 |
| 2938 | 2958 | 0.9498 |
| 1687 | 1707 | 0.9498 |
| 1769 | 1789 | 0.9498 |
| 1686 | 1706 | 0.9498 |

|      |      |        |
|------|------|--------|
| 2000 | 2020 | 0.9497 |
| 2001 | 2021 | 0.9497 |
| 1955 | 1975 | 0.9497 |
| 1954 | 1974 | 0.9497 |
| 2002 | 2022 | 0.9497 |
| 2465 | 2485 | 0.9496 |
| 1694 | 1714 | 0.9496 |
| 1693 | 1713 | 0.9496 |
| 2467 | 2487 | 0.9496 |
| 2695 | 2715 | 0.9495 |
| 2696 | 2716 | 0.9495 |
| 2597 | 2617 | 0.9494 |
| 2598 | 2618 | 0.9494 |
| 2208 | 2228 | 0.9493 |
| 2207 | 2227 | 0.9493 |
| 3175 | 3195 | 0.9493 |
| 2212 | 2232 | 0.9493 |
| 2209 | 2229 | 0.9493 |
| 1099 | 1119 | 0.9492 |
| 1905 | 1925 | 0.9492 |
| 2205 | 2225 | 0.9492 |
| 2206 | 2226 | 0.9492 |
| 2211 | 2231 | 0.9492 |
| 1904 | 1924 | 0.9492 |
| 3090 | 3110 | 0.9490 |
| 2335 | 2355 | 0.9490 |
| 1681 | 1701 | 0.9489 |
| 1682 | 1702 | 0.9489 |
| 1680 | 1700 | 0.9489 |
| 3091 | 3111 | 0.9487 |
| 1737 | 1757 | 0.9487 |
| 3225 | 3245 | 0.9486 |
| 3235 | 3255 | 0.9486 |
| 3234 | 3254 | 0.9486 |
| 3233 | 3253 | 0.9486 |
| 2596 | 2616 | 0.9484 |
| 2595 | 2615 | 0.9484 |
| 999  | 1019 | 0.9481 |
| 2590 | 2610 | 0.9481 |
| 1738 | 1758 | 0.9480 |
| 1849 | 1869 | 0.9479 |
| 1748 | 1768 | 0.9479 |
| 1744 | 1764 | 0.9479 |
| 1746 | 1766 | 0.9479 |
| 1747 | 1767 | 0.9479 |
| 1745 | 1765 | 0.9479 |
| 1838 | 1858 | 0.9478 |
| 1839 | 1859 | 0.9478 |
| 3024 | 3044 | 0.9476 |
| 1840 | 1860 | 0.9474 |
| 1842 | 1862 | 0.9474 |
| 1841 | 1861 | 0.9474 |
| 1843 | 1863 | 0.9474 |
| 1000 | 1020 | 0.9474 |
| 2810 | 2830 | 0.9462 |
| 2809 | 2829 | 0.9462 |



|      |      |        |
|------|------|--------|
| 2056 | 2076 | 0.9459 |
| 2055 | 2075 | 0.9459 |
| 3023 | 3043 | 0.9457 |
| 2694 | 2714 | 0.9456 |
| 2006 | 2026 | 0.9450 |
| 2008 | 2028 | 0.9450 |
| 2007 | 2027 | 0.9450 |
| 2828 | 2848 | 0.9447 |
| 2980 | 3000 | 0.9445 |
| 2978 | 2998 | 0.9445 |
| 2979 | 2999 | 0.9445 |
| 2822 | 2842 | 0.9444 |
| 2982 | 3002 | 0.9444 |
| 2823 | 2843 | 0.9444 |
| 2983 | 3003 | 0.9444 |
| 2827 | 2847 | 0.9444 |
| 2984 | 3004 | 0.9444 |
| 2821 | 2841 | 0.9444 |
| 2985 | 3005 | 0.9444 |
| 2824 | 2844 | 0.9444 |
| 2820 | 2840 | 0.9444 |
| 2981 | 3001 | 0.9444 |
| 2826 | 2846 | 0.9444 |
| 2825 | 2845 | 0.9444 |
| 3331 | 3351 | 0.9440 |
| 2691 | 2711 | 0.9434 |
| 2693 | 2713 | 0.9434 |
| 2692 | 2712 | 0.9434 |
| 3255 | 3275 | 0.9433 |
| 3254 | 3274 | 0.9433 |
| 3253 | 3273 | 0.9433 |
| 3258 | 3278 | 0.9432 |
| 3257 | 3277 | 0.9432 |
| 3256 | 3276 | 0.9432 |
| 3290 | 3310 | 0.9430 |
| 3293 | 3313 | 0.9430 |
| 3294 | 3314 | 0.9430 |
| 3289 | 3309 | 0.9429 |
| 3291 | 3311 | 0.9429 |
| 3287 | 3307 | 0.9429 |
| 3292 | 3312 | 0.9429 |
| 3288 | 3308 | 0.9429 |
| 3243 | 3263 | 0.9423 |
| 3244 | 3264 | 0.9423 |
| 3242 | 3262 | 0.9422 |
| 3241 | 3261 | 0.9422 |
| 3240 | 3260 | 0.9422 |
| 3239 | 3259 | 0.9420 |
| 1723 | 1743 | 0.9420 |
| 1722 | 1742 | 0.9419 |
| 2811 | 2831 | 0.9416 |
| 2812 | 2832 | 0.9416 |
| 2814 | 2834 | 0.9414 |
| 2813 | 2833 | 0.9414 |
| 1763 | 1783 | 0.9407 |
| 1765 | 1785 | 0.9407 |

|      |      |        |
|------|------|--------|
| 1764 | 1784 | 0.9407 |
| 1762 | 1782 | 0.9407 |
| 1766 | 1786 | 0.9406 |
| 1767 | 1787 | 0.9406 |
| 1887 | 1907 | 0.9398 |
| 1751 | 1771 | 0.9398 |
| 1888 | 1908 | 0.9398 |
| 1756 | 1776 | 0.9398 |
| 1889 | 1909 | 0.9398 |
| 2272 | 2292 | 0.9398 |
| 1754 | 1774 | 0.9398 |
| 1890 | 1910 | 0.9398 |
| 1752 | 1772 | 0.9398 |
| 1886 | 1906 | 0.9398 |
| 1755 | 1775 | 0.9398 |
| 1753 | 1773 | 0.9398 |
| 1878 | 1898 | 0.9397 |
| 1879 | 1899 | 0.9397 |
| 1880 | 1900 | 0.9397 |
| 1891 | 1911 | 0.9396 |
| 1877 | 1897 | 0.9396 |
| 3151 | 3171 | 0.9396 |
| 2988 | 3008 | 0.9395 |
| 2992 | 3012 | 0.9395 |
| 2990 | 3010 | 0.9395 |
| 2989 | 3009 | 0.9395 |
| 2991 | 3011 | 0.9395 |
| 3148 | 3168 | 0.9394 |
| 2994 | 3014 | 0.9390 |
| 1749 | 1769 | 0.9388 |
| 3328 | 3348 | 0.9385 |
| 3329 | 3349 | 0.9384 |
| 1965 | 1985 | 0.9382 |
| 687  | 707  | 0.9381 |
| 686  | 706  | 0.9381 |
| 1968 | 1988 | 0.9380 |
| 992  | 1012 | 0.9380 |
| 1917 | 1937 | 0.9380 |
| 1969 | 1989 | 0.9380 |
| 1970 | 1990 | 0.9380 |
| 1915 | 1935 | 0.9380 |
| 1971 | 1991 | 0.9380 |
| 994  | 1014 | 0.9380 |
| 1967 | 1987 | 0.9380 |
| 1916 | 1936 | 0.9380 |
| 1972 | 1992 | 0.9380 |
| 993  | 1013 | 0.9380 |
| 528  | 548  | 0.9378 |
| 527  | 547  | 0.9378 |
| 1778 | 1798 | 0.9378 |
| 2378 | 2398 | 0.9376 |
| 2380 | 2400 | 0.9376 |
| 2381 | 2401 | 0.9376 |
| 1701 | 1721 | 0.9375 |
| 1698 | 1718 | 0.9375 |
| 2379 | 2399 | 0.9375 |

|      |      |        |
|------|------|--------|
| 2449 | 2469 | 0.9375 |
| 377  | 397  | 0.9375 |
| 2448 | 2468 | 0.9375 |
| 2451 | 2471 | 0.9375 |
| 2450 | 2470 | 0.9375 |
| 1700 | 1720 | 0.9375 |
| 1699 | 1719 | 0.9375 |
| 2453 | 2473 | 0.9375 |
| 1697 | 1717 | 0.9375 |
| 376  | 396  | 0.9375 |
| 2452 | 2472 | 0.9375 |
| 2941 | 2961 | 0.9374 |
| 2629 | 2649 | 0.9373 |
| 3338 | 3358 | 0.9373 |
| 3337 | 3357 | 0.9373 |
| 3339 | 3359 | 0.9373 |
| 3261 | 3281 | 0.9373 |
| 684  | 704  | 0.9373 |
| 1997 | 2017 | 0.9372 |
| 1998 | 2018 | 0.9372 |
| 2004 | 2024 | 0.9372 |
| 1956 | 1976 | 0.9372 |
| 1996 | 2016 | 0.9372 |
| 1999 | 2019 | 0.9372 |
| 1695 | 1715 | 0.9371 |
| 1895 | 1915 | 0.9371 |
| 1696 | 1716 | 0.9371 |
| 2466 | 2486 | 0.9371 |
| 2273 | 2293 | 0.9371 |
| 1896 | 1916 | 0.9371 |
| 2204 | 2224 | 0.9370 |
| 1829 | 1849 | 0.9370 |
| 1831 | 1851 | 0.9370 |
| 524  | 544  | 0.9370 |
| 523  | 543  | 0.9370 |
| 1828 | 1848 | 0.9370 |
| 2198 | 2218 | 0.9369 |
| 2600 | 2620 | 0.9369 |
| 2599 | 2619 | 0.9369 |
| 2203 | 2223 | 0.9369 |
| 1994 | 2014 | 0.9368 |
| 2210 | 2230 | 0.9368 |
| 2336 | 2356 | 0.9368 |
| 3177 | 3197 | 0.9367 |
| 1026 | 1046 | 0.9365 |
| 1679 | 1699 | 0.9364 |
| 3146 | 3166 | 0.9364 |
| 3147 | 3167 | 0.9364 |
| 1995 | 2015 | 0.9364 |
| 1027 | 1047 | 0.9361 |
| 2280 | 2300 | 0.9361 |
| 1028 | 1048 | 0.9361 |
| 2279 | 2299 | 0.9361 |
| 1029 | 1049 | 0.9361 |
| 2213 | 2233 | 0.9359 |
| 2587 | 2607 | 0.9358 |

|      |      |        |
|------|------|--------|
| 2592 | 2612 | 0.9355 |
| 3021 | 3041 | 0.9355 |
| 3020 | 3040 | 0.9355 |
| 1854 | 1874 | 0.9354 |
| 1852 | 1872 | 0.9354 |
| 1741 | 1761 | 0.9354 |
| 2593 | 2613 | 0.9354 |
| 1739 | 1759 | 0.9354 |
| 1853 | 1873 | 0.9354 |
| 2594 | 2614 | 0.9354 |
| 1743 | 1763 | 0.9354 |
| 1742 | 1762 | 0.9354 |
| 1740 | 1760 | 0.9354 |
| 3025 | 3045 | 0.9351 |
| 1872 | 1892 | 0.9344 |
| 1874 | 1894 | 0.9344 |
| 1873 | 1893 | 0.9344 |
| 3093 | 3113 | 0.9334 |
| 3092 | 3112 | 0.9334 |
| 2995 | 3015 | 0.9334 |
| 3094 | 3114 | 0.9334 |
| 2840 | 2860 | 0.9330 |
| 3330 | 3350 | 0.9330 |
| 3173 | 3193 | 0.9329 |
| 1086 | 1106 | 0.9328 |
| 1092 | 1112 | 0.9328 |
| 1088 | 1108 | 0.9328 |
| 1091 | 1111 | 0.9328 |
| 1085 | 1105 | 0.9328 |
| 1090 | 1110 | 0.9328 |
| 1087 | 1107 | 0.9328 |
| 1089 | 1109 | 0.9328 |
| 2009 | 2029 | 0.9326 |
| 1855 | 1875 | 0.9326 |
| 3298 | 3318 | 0.9318 |
| 2634 | 2654 | 0.9317 |
| 2635 | 2655 | 0.9317 |
| 2631 | 2651 | 0.9315 |
| 2383 | 2403 | 0.9310 |
| 3281 | 3301 | 0.9308 |
| 3275 | 3295 | 0.9308 |
| 3252 | 3272 | 0.9308 |
| 2690 | 2710 | 0.9308 |
| 3274 | 3294 | 0.9308 |
| 3273 | 3293 | 0.9308 |
| 3295 | 3315 | 0.9305 |
| 2998 | 3018 | 0.9298 |
| 928  | 948  | 0.9296 |
| 2818 | 2838 | 0.9292 |
| 2819 | 2839 | 0.9292 |
| 2815 | 2835 | 0.9291 |
| 2816 | 2836 | 0.9291 |
| 2817 | 2837 | 0.9291 |
| 2358 | 2378 | 0.9290 |
| 3099 | 3119 | 0.9288 |
| 3098 | 3118 | 0.9284 |

|      |      |        |
|------|------|--------|
| 3095 | 3115 | 0.9283 |
| 3096 | 3116 | 0.9283 |
| 3097 | 3117 | 0.9283 |
| 1768 | 1788 | 0.9281 |
| 2044 | 2064 | 0.9280 |
| 958  | 978  | 0.9278 |
| 959  | 979  | 0.9278 |
| 957  | 977  | 0.9278 |
| 3152 | 3172 | 0.9276 |
| 1892 | 1912 | 0.9269 |
| 1875 | 1895 | 0.9269 |
| 1894 | 1914 | 0.9269 |
| 1893 | 1913 | 0.9269 |
| 3086 | 3106 | 0.9266 |
| 3087 | 3107 | 0.9265 |
| 3088 | 3108 | 0.9264 |
| 3089 | 3109 | 0.9264 |
| 3327 | 3347 | 0.9260 |
| 2276 | 2296 | 0.9258 |
| 2277 | 2297 | 0.9258 |
| 786  | 806  | 0.9256 |
| 787  | 807  | 0.9256 |
| 2566 | 2586 | 0.9255 |
| 688  | 708  | 0.9255 |
| 1913 | 1933 | 0.9254 |
| 1912 | 1932 | 0.9254 |
| 2568 | 2588 | 0.9254 |
| 1914 | 1934 | 0.9254 |
| 2569 | 2589 | 0.9253 |
| 1920 | 1940 | 0.9253 |
| 526  | 546  | 0.9253 |
| 1919 | 1939 | 0.9253 |
| 525  | 545  | 0.9253 |
| 790  | 810  | 0.9251 |
| 1921 | 1941 | 0.9251 |
| 788  | 808  | 0.9251 |
| 789  | 809  | 0.9251 |
| 379  | 399  | 0.9250 |
| 1918 | 1938 | 0.9250 |
| 378  | 398  | 0.9250 |
| 1908 | 1928 | 0.9250 |
| 3213 | 3233 | 0.9249 |
| 3215 | 3235 | 0.9249 |
| 2333 | 2353 | 0.9249 |
| 3214 | 3234 | 0.9249 |
| 2332 | 2352 | 0.9249 |
| 2572 | 2592 | 0.9248 |
| 2574 | 2594 | 0.9248 |
| 2330 | 2350 | 0.9248 |
| 2005 | 2025 | 0.9248 |
| 2573 | 2593 | 0.9248 |
| 1952 | 1972 | 0.9247 |
| 1953 | 1973 | 0.9247 |
| 2937 | 2957 | 0.9247 |
| 2564 | 2584 | 0.9246 |
| 2468 | 2488 | 0.9246 |

|      |      |        |
|------|------|--------|
| 1826 | 1846 | 0.9246 |
| 1830 | 1850 | 0.9245 |
| 2698 | 2718 | 0.9245 |
| 211  | 231  | 0.9245 |
| 690  | 710  | 0.9245 |
| 691  | 711  | 0.9245 |
| 1827 | 1847 | 0.9245 |
| 2697 | 2717 | 0.9245 |
| 210  | 230  | 0.9245 |
| 2202 | 2222 | 0.9244 |
| 3079 | 3099 | 0.9244 |
| 2199 | 2219 | 0.9244 |
| 3179 | 3199 | 0.9242 |
| 3174 | 3194 | 0.9242 |
| 1100 | 1120 | 0.9242 |
| 1101 | 1121 | 0.9242 |
| 3178 | 3198 | 0.9242 |
| 2334 | 2354 | 0.9241 |
| 1678 | 1698 | 0.9237 |
| 2284 | 2304 | 0.9236 |
| 2281 | 2301 | 0.9236 |
| 2283 | 2303 | 0.9236 |
| 2282 | 2302 | 0.9236 |
| 173  | 193  | 0.9234 |
| 174  | 194  | 0.9234 |
| 2214 | 2234 | 0.9234 |
| 2586 | 2606 | 0.9233 |
| 2589 | 2609 | 0.9232 |
| 2588 | 2608 | 0.9232 |
| 2591 | 2611 | 0.9231 |
| 2806 | 2826 | 0.9217 |
| 1001 | 1021 | 0.9216 |
| 3145 | 3165 | 0.9213 |
| 2058 | 2078 | 0.9210 |
| 2996 | 3016 | 0.9209 |
| 2054 | 2074 | 0.9209 |
| 2057 | 2077 | 0.9209 |
| 3022 | 3042 | 0.9207 |
| 2061 | 2081 | 0.9207 |
| 3057 | 3077 | 0.9206 |
| 2841 | 2861 | 0.9205 |
| 3172 | 3192 | 0.9204 |
| 923  | 943  | 0.9203 |
| 922  | 942  | 0.9203 |
| 1084 | 1104 | 0.9203 |
| 2010 | 2030 | 0.9201 |
| 2011 | 2031 | 0.9201 |
| 1093 | 1113 | 0.9200 |
| 2012 | 2032 | 0.9200 |
| 1098 | 1118 | 0.9197 |
| 3300 | 3320 | 0.9195 |
| 3299 | 3319 | 0.9194 |
| 3296 | 3316 | 0.9193 |
| 2382 | 2402 | 0.9193 |
| 3297 | 3317 | 0.9193 |
| 2636 | 2656 | 0.9192 |

|      |      |        |
|------|------|--------|
| 2633 | 2653 | 0.9192 |
| 2637 | 2657 | 0.9192 |
| 3198 | 3218 | 0.9190 |
| 2632 | 2652 | 0.9190 |
| 2630 | 2650 | 0.9190 |
| 2702 | 2722 | 0.9189 |
| 2703 | 2723 | 0.9189 |
| 1032 | 1052 | 0.9187 |
| 1031 | 1051 | 0.9187 |
| 2639 | 2659 | 0.9186 |
| 2638 | 2658 | 0.9186 |
| 3272 | 3292 | 0.9184 |
| 3276 | 3296 | 0.9184 |
| 3277 | 3297 | 0.9184 |
| 2045 | 2065 | 0.9178 |
| 2048 | 2068 | 0.9178 |
| 2047 | 2067 | 0.9178 |
| 2046 | 2066 | 0.9178 |
| 2050 | 2070 | 0.9178 |
| 2049 | 2069 | 0.9178 |
| 1717 | 1737 | 0.9177 |
| 1720 | 1740 | 0.9176 |
| 1718 | 1738 | 0.9176 |
| 1716 | 1736 | 0.9176 |
| 1715 | 1735 | 0.9176 |
| 1721 | 1741 | 0.9176 |
| 1719 | 1739 | 0.9176 |
| 2065 | 2085 | 0.9175 |
| 147  | 167  | 0.9173 |
| 148  | 168  | 0.9173 |
| 927  | 947  | 0.9171 |
| 989  | 1009 | 0.9168 |
| 991  | 1011 | 0.9164 |
| 990  | 1010 | 0.9164 |
| 3190 | 3210 | 0.9160 |
| 3189 | 3209 | 0.9160 |
| 3188 | 3208 | 0.9160 |
| 2357 | 2377 | 0.9158 |
| 956  | 976  | 0.9156 |
| 3154 | 3174 | 0.9151 |
| 3153 | 3173 | 0.9151 |
| 2071 | 2091 | 0.9144 |
| 302  | 322  | 0.9141 |
| 303  | 323  | 0.9141 |
| 304  | 324  | 0.9141 |
| 300  | 320  | 0.9141 |
| 305  | 325  | 0.9141 |
| 299  | 319  | 0.9141 |
| 301  | 321  | 0.9141 |
| 532  | 552  | 0.9140 |
| 995  | 1015 | 0.9136 |
| 996  | 1016 | 0.9136 |
| 200  | 220  | 0.9135 |
| 2278 | 2298 | 0.9134 |
| 2274 | 2294 | 0.9133 |
| 2275 | 2295 | 0.9133 |

|      |      |        |
|------|------|--------|
| 1702 | 1722 | 0.9132 |
| 1703 | 1723 | 0.9131 |
| 2565 | 2585 | 0.9130 |
| 685  | 705  | 0.9130 |
| 1973 | 1993 | 0.9130 |
| 2567 | 2587 | 0.9130 |
| 2571 | 2591 | 0.9129 |
| 3340 | 3360 | 0.9128 |
| 2570 | 2590 | 0.9128 |
| 1911 | 1931 | 0.9127 |
| 998  | 1018 | 0.9126 |
| 997  | 1017 | 0.9126 |
| 2447 | 2467 | 0.9125 |
| 204  | 224  | 0.9125 |
| 1909 | 1929 | 0.9125 |
| 203  | 223  | 0.9125 |
| 1910 | 1930 | 0.9125 |
| 3218 | 3238 | 0.9124 |
| 3216 | 3236 | 0.9124 |
| 205  | 225  | 0.9124 |
| 3217 | 3237 | 0.9124 |
| 206  | 226  | 0.9124 |
| 682  | 702  | 0.9123 |
| 2331 | 2351 | 0.9123 |
| 3262 | 3282 | 0.9123 |
| 683  | 703  | 0.9123 |
| 3263 | 3283 | 0.9122 |
| 3078 | 3098 | 0.9122 |
| 1922 | 1942 | 0.9121 |
| 197  | 217  | 0.9121 |
| 2704 | 2724 | 0.9121 |
| 689  | 709  | 0.9120 |
| 522  | 542  | 0.9120 |
| 2337 | 2357 | 0.9120 |
| 2201 | 2221 | 0.9119 |
| 2197 | 2217 | 0.9119 |
| 1024 | 1044 | 0.9119 |
| 2200 | 2220 | 0.9119 |
| 1025 | 1045 | 0.9119 |
| 1801 | 1821 | 0.9119 |
| 1023 | 1043 | 0.9119 |
| 1539 | 1559 | 0.9119 |
| 2575 | 2595 | 0.9118 |
| 2576 | 2596 | 0.9118 |
| 2784 | 2804 | 0.9118 |
| 1993 | 2013 | 0.9118 |
| 680  | 700  | 0.9117 |
| 212  | 232  | 0.9117 |
| 3180 | 3200 | 0.9117 |
| 681  | 701  | 0.9117 |
| 1664 | 1684 | 0.9116 |
| 1985 | 2005 | 0.9115 |
| 1667 | 1687 | 0.9115 |
| 675  | 695  | 0.9114 |
| 1802 | 1822 | 0.9114 |
| 2603 | 2623 | 0.9114 |



|      |      |        |
|------|------|--------|
| 676  | 696  | 0.9114 |
| 1668 | 1688 | 0.9114 |
| 674  | 694  | 0.9114 |
| 2602 | 2622 | 0.9114 |
| 2601 | 2621 | 0.9111 |
| 1030 | 1050 | 0.9111 |
| 2309 | 2329 | 0.9110 |
| 1665 | 1685 | 0.9110 |
| 1666 | 1686 | 0.9110 |
| 2585 | 2605 | 0.9109 |
| 673  | 693  | 0.9109 |
| 2563 | 2583 | 0.9108 |
| 2053 | 2073 | 0.9105 |
| 2052 | 2072 | 0.9105 |
| 2051 | 2071 | 0.9105 |
| 2446 | 2466 | 0.9103 |
| 3019 | 3039 | 0.9103 |
| 2445 | 2465 | 0.9102 |
| 2444 | 2464 | 0.9102 |
| 2443 | 2463 | 0.9101 |
| 2887 | 2907 | 0.9099 |
| 2433 | 2453 | 0.9099 |
| 2442 | 2462 | 0.9098 |
| 2440 | 2460 | 0.9098 |
| 2441 | 2461 | 0.9098 |
| 3061 | 3081 | 0.9097 |
| 2427 | 2447 | 0.9097 |
| 1860 | 1880 | 0.9095 |
| 1870 | 1890 | 0.9094 |
| 1869 | 1889 | 0.9094 |
| 3017 | 3037 | 0.9094 |
| 1871 | 1891 | 0.9094 |
| 2805 | 2825 | 0.9092 |
| 1609 | 1629 | 0.9091 |
| 1858 | 1878 | 0.9091 |
| 1859 | 1879 | 0.9091 |
| 1607 | 1627 | 0.9091 |
| 1610 | 1630 | 0.9091 |
| 1612 | 1632 | 0.9091 |
| 1608 | 1628 | 0.9091 |
| 1611 | 1631 | 0.9091 |
| 1102 | 1122 | 0.9090 |
| 1103 | 1123 | 0.9090 |
| 3341 | 3361 | 0.9086 |
| 3342 | 3362 | 0.9086 |
| 3343 | 3363 | 0.9086 |
| 1541 | 1561 | 0.9085 |
| 2059 | 2079 | 0.9084 |
| 2060 | 2080 | 0.9084 |
| 2064 | 2084 | 0.9083 |
| 2063 | 2083 | 0.9083 |
| 2062 | 2082 | 0.9083 |
| 3058 | 3078 | 0.9082 |
| 1825 | 1845 | 0.9079 |
| 924  | 944  | 0.9078 |
| 1856 | 1876 | 0.9076 |

|      |      |        |
|------|------|--------|
| 3304 | 3324 | 0.9075 |
| 3303 | 3323 | 0.9073 |
| 3302 | 3322 | 0.9073 |
| 2043 | 2063 | 0.9071 |
| 2042 | 2062 | 0.9071 |
| 2069 | 2089 | 0.9071 |
| 2070 | 2090 | 0.9071 |
| 2040 | 2060 | 0.9070 |
| 2039 | 2059 | 0.9070 |
| 2271 | 2291 | 0.9070 |
| 2038 | 2058 | 0.9070 |
| 3301 | 3321 | 0.9070 |
| 925  | 945  | 0.9067 |
| 3212 | 3232 | 0.9066 |
| 3197 | 3217 | 0.9065 |
| 2700 | 2720 | 0.9065 |
| 3026 | 3046 | 0.9065 |
| 2701 | 2721 | 0.9065 |
| 3279 | 3299 | 0.9060 |
| 1033 | 1053 | 0.9060 |
| 2384 | 2404 | 0.9060 |
| 2699 | 2719 | 0.9059 |
| 3280 | 3300 | 0.9059 |
| 3278 | 3298 | 0.9059 |
| 2640 | 2660 | 0.9057 |
| 2997 | 3017 | 0.9056 |
| 145  | 165  | 0.9055 |
| 1714 | 1734 | 0.9051 |
| 1713 | 1733 | 0.9051 |
| 2067 | 2087 | 0.9050 |
| 2066 | 2086 | 0.9050 |
| 2068 | 2088 | 0.9050 |
| 146  | 166  | 0.9048 |
| 2999 | 3019 | 0.9048 |
| 3102 | 3122 | 0.9040 |
| 3101 | 3121 | 0.9038 |
| 3100 | 3120 | 0.9038 |
| 3187 | 3207 | 0.9035 |
| 3183 | 3203 | 0.9035 |
| 785  | 805  | 0.9035 |
| 3184 | 3204 | 0.9035 |
| 3191 | 3211 | 0.9034 |
| 3186 | 3206 | 0.9034 |
| 3185 | 3205 | 0.9034 |
| 953  | 973  | 0.9032 |
| 954  | 974  | 0.9031 |
| 955  | 975  | 0.9031 |
| 2072 | 2092 | 0.9019 |
| 2074 | 2094 | 0.9019 |
| 2073 | 2093 | 0.9019 |
| 533  | 553  | 0.9015 |
| 201  | 221  | 0.9006 |
| 1779 | 1799 | 0.9005 |
| 375  | 395  | 0.9005 |
| 288  | 308  | 0.9003 |
| 295  | 315  | 0.9002 |

|      |      |        |
|------|------|--------|
| 791  | 811  | 0.9001 |
| 1623 | 1643 | 0.9000 |
| 1071 | 1091 | 0.9000 |
| 1072 | 1092 | 0.9000 |
| 1068 | 1088 | 0.9000 |
| 1069 | 1089 | 0.9000 |
| 1070 | 1090 | 0.9000 |
| 207  | 227  | 0.8999 |
| 2792 | 2812 | 0.8999 |
| 2794 | 2814 | 0.8999 |
| 208  | 228  | 0.8999 |
| 2793 | 2813 | 0.8999 |
| 1951 | 1971 | 0.8999 |
| 3077 | 3097 | 0.8999 |
| 3076 | 3096 | 0.8999 |
| 209  | 229  | 0.8999 |
| 199  | 219  | 0.8998 |
| 3075 | 3095 | 0.8998 |
| 2328 | 2348 | 0.8998 |
| 2934 | 2954 | 0.8998 |
| 2327 | 2347 | 0.8998 |
| 2326 | 2346 | 0.8998 |
| 2935 | 2955 | 0.8998 |
| 2329 | 2349 | 0.8998 |
| 2628 | 2648 | 0.8998 |
| 1977 | 1997 | 0.8997 |
| 1984 | 2004 | 0.8997 |
| 2936 | 2956 | 0.8997 |
| 1978 | 1998 | 0.8997 |
| 1979 | 1999 | 0.8997 |
| 1976 | 1996 | 0.8997 |
| 2624 | 2644 | 0.8997 |
| 2625 | 2645 | 0.8997 |
| 2796 | 2816 | 0.8996 |
| 1619 | 1639 | 0.8996 |
| 198  | 218  | 0.8996 |
| 2795 | 2815 | 0.8996 |
| 693  | 713  | 0.8996 |
| 2705 | 2725 | 0.8996 |
| 2797 | 2817 | 0.8996 |
| 694  | 714  | 0.8996 |
| 692  | 712  | 0.8996 |
| 2706 | 2726 | 0.8995 |
| 519  | 539  | 0.8995 |
| 521  | 541  | 0.8995 |
| 520  | 540  | 0.8995 |
| 2425 | 2445 | 0.8995 |
| 2799 | 2819 | 0.8995 |
| 2707 | 2727 | 0.8995 |
| 2798 | 2818 | 0.8995 |
| 518  | 538  | 0.8995 |
| 2426 | 2446 | 0.8994 |
| 2196 | 2216 | 0.8994 |
| 1538 | 1558 | 0.8994 |
| 1540 | 1560 | 0.8994 |
| 2785 | 2805 | 0.8994 |

|      |      |        |
|------|------|--------|
| 1022 | 1042 | 0.8994 |
| 1676 | 1696 | 0.8993 |
| 1674 | 1694 | 0.8993 |
| 1675 | 1695 | 0.8993 |
| 678  | 698  | 0.8992 |
| 1988 | 2008 | 0.8992 |
| 1991 | 2011 | 0.8992 |
| 1987 | 2007 | 0.8992 |
| 679  | 699  | 0.8992 |
| 2215 | 2235 | 0.8992 |
| 517  | 537  | 0.8992 |
| 3182 | 3202 | 0.8992 |
| 677  | 697  | 0.8992 |
| 3181 | 3201 | 0.8992 |
| 1989 | 2009 | 0.8992 |
| 1990 | 2010 | 0.8992 |
| 213  | 233  | 0.8992 |
| 1671 | 1691 | 0.8989 |
| 2580 | 2600 | 0.8989 |
| 2579 | 2599 | 0.8989 |
| 2581 | 2601 | 0.8989 |
| 2577 | 2597 | 0.8989 |
| 2338 | 2358 | 0.8989 |
| 1669 | 1689 | 0.8989 |
| 1595 | 1615 | 0.8989 |
| 2578 | 2598 | 0.8989 |
| 1670 | 1690 | 0.8989 |
| 1677 | 1697 | 0.8987 |
| 1804 | 1824 | 0.8986 |
| 2285 | 2305 | 0.8986 |
| 1803 | 1823 | 0.8986 |
| 3060 | 3080 | 0.8985 |
| 2583 | 2603 | 0.8985 |
| 2584 | 2604 | 0.8985 |
| 2582 | 2602 | 0.8985 |
| 175  | 195  | 0.8984 |
| 176  | 196  | 0.8984 |
| 2325 | 2345 | 0.8984 |
| 2561 | 2581 | 0.8983 |
| 2559 | 2579 | 0.8983 |
| 2560 | 2580 | 0.8983 |
| 672  | 692  | 0.8983 |
| 2562 | 2582 | 0.8983 |
| 1345 | 1365 | 0.8982 |
| 2320 | 2340 | 0.8981 |
| 2321 | 2341 | 0.8981 |
| 3018 | 3038 | 0.8978 |
| 988  | 1008 | 0.8977 |
| 50   | 70   | 0.8977 |
| 2432 | 2452 | 0.8974 |
| 2431 | 2451 | 0.8974 |
| 2429 | 2449 | 0.8974 |
| 2430 | 2450 | 0.8974 |
| 3064 | 3084 | 0.8974 |
| 3065 | 3085 | 0.8974 |
| 2439 | 2459 | 0.8973 |

|      |      |        |
|------|------|--------|
| 3063 | 3083 | 0.8973 |
| 3062 | 3082 | 0.8973 |
| 2436 | 2456 | 0.8972 |
| 1861 | 1881 | 0.8970 |
| 1867 | 1887 | 0.8969 |
| 1863 | 1883 | 0.8969 |
| 2884 | 2904 | 0.8969 |
| 1865 | 1885 | 0.8969 |
| 2885 | 2905 | 0.8969 |
| 1866 | 1886 | 0.8969 |
| 1864 | 1884 | 0.8969 |
| 1862 | 1882 | 0.8969 |
| 1868 | 1888 | 0.8969 |
| 1606 | 1626 | 0.8966 |
| 1603 | 1623 | 0.8966 |
| 1005 | 1025 | 0.8966 |
| 1003 | 1023 | 0.8966 |
| 1605 | 1625 | 0.8966 |
| 1004 | 1024 | 0.8966 |
| 1604 | 1624 | 0.8966 |
| 1002 | 1022 | 0.8965 |
| 1040 | 1060 | 0.8959 |
| 3059 | 3079 | 0.8957 |
| 3166 | 3186 | 0.8955 |
| 3169 | 3189 | 0.8954 |
| 3167 | 3187 | 0.8954 |
| 3170 | 3190 | 0.8954 |
| 3168 | 3188 | 0.8954 |
| 1083 | 1103 | 0.8953 |
| 2843 | 2863 | 0.8953 |
| 2844 | 2864 | 0.8953 |
| 2842 | 2862 | 0.8953 |
| 149  | 169  | 0.8952 |
| 3171 | 3191 | 0.8952 |
| 1095 | 1115 | 0.8950 |
| 1857 | 1877 | 0.8950 |
| 1094 | 1114 | 0.8950 |
| 3305 | 3325 | 0.8949 |
| 1346 | 1366 | 0.8947 |
| 3027 | 3047 | 0.8947 |
| 2041 | 2061 | 0.8947 |
| 1348 | 1368 | 0.8947 |
| 1096 | 1116 | 0.8947 |
| 1347 | 1367 | 0.8947 |
| 1097 | 1117 | 0.8947 |
| 926  | 946  | 0.8944 |
| 3205 | 3225 | 0.8941 |
| 3211 | 3231 | 0.8941 |
| 3016 | 3036 | 0.8941 |
| 3201 | 3221 | 0.8940 |
| 3203 | 3223 | 0.8940 |
| 3202 | 3222 | 0.8940 |
| 3204 | 3224 | 0.8940 |
| 2882 | 2902 | 0.8936 |
| 3264 | 3284 | 0.8935 |
| 3265 | 3285 | 0.8935 |

|      |      |        |
|------|------|--------|
| 3269 | 3289 | 0.8935 |
| 3268 | 3288 | 0.8935 |
| 3266 | 3286 | 0.8935 |
| 3267 | 3287 | 0.8935 |
| 2689 | 2709 | 0.8934 |
| 3270 | 3290 | 0.8934 |
| 2688 | 2708 | 0.8934 |
| 3271 | 3291 | 0.8934 |
| 3028 | 3048 | 0.8933 |
| 2641 | 2661 | 0.8932 |
| 2643 | 2663 | 0.8930 |
| 2646 | 2666 | 0.8930 |
| 2642 | 2662 | 0.8930 |
| 1596 | 1616 | 0.8921 |
| 929  | 949  | 0.8921 |
| 2719 | 2739 | 0.8918 |
| 287  | 307  | 0.8916 |
| 2356 | 2376 | 0.8909 |
| 3192 | 3212 | 0.8909 |
| 784  | 804  | 0.8909 |
| 309  | 329  | 0.8906 |
| 1710 | 1730 | 0.8904 |
| 1709 | 1729 | 0.8904 |
| 960  | 980  | 0.8903 |
| 3155 | 3175 | 0.8900 |
| 2077 | 2097 | 0.8896 |
| 2076 | 2096 | 0.8895 |
| 172  | 192  | 0.8895 |
| 2075 | 2095 | 0.8895 |
| 298  | 318  | 0.8894 |
| 3326 | 3346 | 0.8885 |
| 1704 | 1724 | 0.8881 |
| 202  | 222  | 0.8881 |
| 371  | 391  | 0.8880 |
| 1974 | 1994 | 0.8880 |
| 1975 | 1995 | 0.8880 |
| 296  | 316  | 0.8877 |
| 49   | 69   | 0.8876 |
| 46   | 66   | 0.8876 |
| 48   | 68   | 0.8876 |
| 1076 | 1096 | 0.8875 |
| 1078 | 1098 | 0.8875 |
| 381  | 401  | 0.8875 |
| 1073 | 1093 | 0.8875 |
| 1077 | 1097 | 0.8875 |
| 1075 | 1095 | 0.8875 |
| 1074 | 1094 | 0.8875 |
| 380  | 400  | 0.8875 |
| 2791 | 2811 | 0.8874 |
| 1622 | 1642 | 0.8874 |
| 1364 | 1384 | 0.8874 |
| 2469 | 2489 | 0.8874 |
| 2626 | 2646 | 0.8873 |
| 3073 | 3093 | 0.8873 |
| 3074 | 3094 | 0.8873 |
| 1621 | 1641 | 0.8872 |

|      |      |        |
|------|------|--------|
| 826  | 846  | 0.8872 |
| 1980 | 2000 | 0.8872 |
| 1982 | 2002 | 0.8872 |
| 1981 | 2001 | 0.8872 |
| 1620 | 1640 | 0.8871 |
| 1663 | 1683 | 0.8870 |
| 3306 | 3326 | 0.8870 |
| 2708 | 2728 | 0.8869 |
| 1537 | 1557 | 0.8869 |
| 1800 | 1820 | 0.8869 |
| 2786 | 2806 | 0.8869 |
| 1992 | 2012 | 0.8868 |
| 196  | 216  | 0.8868 |
| 827  | 847  | 0.8868 |
| 2783 | 2803 | 0.8868 |
| 830  | 850  | 0.8868 |
| 831  | 851  | 0.8868 |
| 829  | 849  | 0.8868 |
| 189  | 209  | 0.8867 |
| 516  | 536  | 0.8867 |
| 187  | 207  | 0.8866 |
| 188  | 208  | 0.8866 |
| 2606 | 2626 | 0.8865 |
| 2607 | 2627 | 0.8865 |
| 1986 | 2006 | 0.8865 |
| 2605 | 2625 | 0.8865 |
| 2604 | 2624 | 0.8864 |
| 2216 | 2236 | 0.8864 |
| 2217 | 2237 | 0.8864 |
| 1929 | 1949 | 0.8861 |
| 2310 | 2330 | 0.8860 |
| 2308 | 2328 | 0.8859 |
| 2307 | 2327 | 0.8859 |
| 671  | 691  | 0.8858 |
| 2312 | 2332 | 0.8858 |
| 2314 | 2334 | 0.8858 |
| 670  | 690  | 0.8858 |
| 2718 | 2738 | 0.8857 |
| 2557 | 2577 | 0.8857 |
| 2558 | 2578 | 0.8857 |
| 2313 | 2333 | 0.8857 |
| 178  | 198  | 0.8856 |
| 2319 | 2339 | 0.8855 |
| 987  | 1007 | 0.8854 |
| 179  | 199  | 0.8854 |
| 186  | 206  | 0.8853 |
| 483  | 503  | 0.8851 |
| 484  | 504  | 0.8850 |
| 51   | 71   | 0.8850 |
| 3069 | 3089 | 0.8849 |
| 2435 | 2455 | 0.8849 |
| 2434 | 2454 | 0.8849 |
| 2428 | 2448 | 0.8849 |
| 3067 | 3087 | 0.8849 |
| 3068 | 3088 | 0.8849 |
| 485  | 505  | 0.8849 |

|      |      |        |
|------|------|--------|
| 3066 | 3086 | 0.8849 |
| 2886 | 2906 | 0.8849 |
| 1786 | 1806 | 0.8849 |
| 1785 | 1805 | 0.8848 |
| 1784 | 1804 | 0.8848 |
| 1780 | 1800 | 0.8848 |
| 1782 | 1802 | 0.8848 |
| 2888 | 2908 | 0.8848 |
| 1783 | 1803 | 0.8848 |
| 669  | 689  | 0.8847 |
| 14   | 34   | 0.8847 |
| 13   | 33   | 0.8847 |
| 1598 | 1618 | 0.8846 |
| 2547 | 2567 | 0.8845 |
| 1602 | 1622 | 0.8842 |
| 1344 | 1364 | 0.8842 |
| 2802 | 2822 | 0.8842 |
| 2803 | 2823 | 0.8842 |
| 2801 | 2821 | 0.8842 |
| 2804 | 2824 | 0.8842 |
| 2800 | 2820 | 0.8842 |
| 1039 | 1059 | 0.8841 |
| 1613 | 1633 | 0.8841 |
| 3103 | 3123 | 0.8841 |
| 1104 | 1124 | 0.8841 |
| 1823 | 1843 | 0.8840 |
| 1343 | 1363 | 0.8840 |
| 1105 | 1125 | 0.8839 |
| 3144 | 3164 | 0.8837 |
| 3346 | 3366 | 0.8837 |
| 3347 | 3367 | 0.8837 |
| 2546 | 2566 | 0.8836 |
| 2545 | 2565 | 0.8836 |
| 3345 | 3365 | 0.8835 |
| 3344 | 3364 | 0.8835 |
| 3056 | 3076 | 0.8833 |
| 3351 | 3371 | 0.8829 |
| 1082 | 1102 | 0.8828 |
| 921  | 941  | 0.8828 |
| 1810 | 1830 | 0.8826 |
| 2014 | 2034 | 0.8825 |
| 2013 | 2033 | 0.8825 |
| 1349 | 1369 | 0.8822 |
| 1353 | 1373 | 0.8822 |
| 1350 | 1370 | 0.8822 |
| 1351 | 1371 | 0.8822 |
| 3364 | 3384 | 0.8819 |
| 2270 | 2290 | 0.8819 |
| 3015 | 3035 | 0.8817 |
| 2399 | 2419 | 0.8816 |
| 2400 | 2420 | 0.8816 |
| 3210 | 3230 | 0.8815 |
| 3207 | 3227 | 0.8815 |
| 3206 | 3226 | 0.8815 |
| 3200 | 3220 | 0.8815 |
| 2398 | 2418 | 0.8815 |



|      |      |        |
|------|------|--------|
| 3199 | 3219 | 0.8815 |
| 3209 | 3229 | 0.8815 |
| 3208 | 3228 | 0.8815 |
| 3196 | 3216 | 0.8814 |
| 3195 | 3215 | 0.8814 |
| 3194 | 3214 | 0.8814 |
| 486  | 506  | 0.8812 |
| 2687 | 2707 | 0.8809 |
| 3325 | 3345 | 0.8808 |
| 3307 | 3327 | 0.8806 |
| 143  | 163  | 0.8805 |
| 2645 | 2665 | 0.8805 |
| 2644 | 2664 | 0.8805 |
| 144  | 164  | 0.8804 |
| 1711 | 1731 | 0.8802 |
| 1712 | 1732 | 0.8802 |
| 1661 | 1681 | 0.8800 |
| 1662 | 1682 | 0.8800 |
| 1041 | 1061 | 0.8799 |
| 3001 | 3021 | 0.8797 |
| 480  | 500  | 0.8796 |
| 1597 | 1617 | 0.8796 |
| 3000 | 3020 | 0.8796 |
| 1038 | 1058 | 0.8794 |
| 1036 | 1056 | 0.8794 |
| 1037 | 1057 | 0.8794 |
| 2035 | 2055 | 0.8793 |
| 2037 | 2057 | 0.8793 |
| 2036 | 2056 | 0.8793 |
| 286  | 306  | 0.8791 |
| 276  | 296  | 0.8785 |
| 277  | 297  | 0.8785 |
| 783  | 803  | 0.8785 |
| 782  | 802  | 0.8785 |
| 2355 | 2375 | 0.8784 |
| 2354 | 2374 | 0.8784 |
| 2403 | 2423 | 0.8783 |
| 1705 | 1725 | 0.8782 |
| 2402 | 2422 | 0.8782 |
| 307  | 327  | 0.8781 |
| 308  | 328  | 0.8781 |
| 306  | 326  | 0.8781 |
| 310  | 330  | 0.8781 |
| 274  | 294  | 0.8780 |
| 1707 | 1727 | 0.8779 |
| 1706 | 1726 | 0.8779 |
| 1708 | 1728 | 0.8779 |
| 961  | 981  | 0.8778 |
| 2492 | 2512 | 0.8778 |
| 962  | 982  | 0.8777 |
| 2353 | 2373 | 0.8776 |
| 3159 | 3179 | 0.8775 |
| 3161 | 3181 | 0.8775 |
| 3157 | 3177 | 0.8775 |
| 3156 | 3176 | 0.8775 |
| 2352 | 2372 | 0.8775 |

|      |      |        |
|------|------|--------|
| 3162 | 3182 | 0.8775 |
| 3160 | 3180 | 0.8775 |
| 2351 | 2371 | 0.8775 |
| 3158 | 3178 | 0.8775 |
| 1659 | 1679 | 0.8774 |
| 2406 | 2426 | 0.8772 |
| 2033 | 2053 | 0.8772 |
| 2405 | 2425 | 0.8771 |
| 2404 | 2424 | 0.8771 |
| 1015 | 1035 | 0.8771 |
| 2408 | 2428 | 0.8769 |
| 777  | 797  | 0.8767 |
| 534  | 554  | 0.8765 |
| 1512 | 1532 | 0.8757 |
| 1513 | 1533 | 0.8757 |
| 1510 | 1530 | 0.8757 |
| 1511 | 1531 | 0.8757 |
| 794  | 814  | 0.8756 |
| 1514 | 1534 | 0.8756 |
| 374  | 394  | 0.8755 |
| 793  | 813  | 0.8755 |
| 792  | 812  | 0.8755 |
| 1570 | 1590 | 0.8753 |
| 293  | 313  | 0.8753 |
| 292  | 312  | 0.8753 |
| 290  | 310  | 0.8753 |
| 1567 | 1587 | 0.8753 |
| 289  | 309  | 0.8753 |
| 291  | 311  | 0.8753 |
| 952  | 972  | 0.8752 |
| 774  | 794  | 0.8752 |
| 339  | 359  | 0.8752 |
| 294  | 314  | 0.8752 |
| 775  | 795  | 0.8752 |
| 1624 | 1644 | 0.8751 |
| 47   | 67   | 0.8751 |
| 1067 | 1087 | 0.8749 |
| 1362 | 1382 | 0.8749 |
| 825  | 845  | 0.8749 |
| 1950 | 1970 | 0.8749 |
| 2933 | 2953 | 0.8748 |
| 2931 | 2951 | 0.8748 |
| 2627 | 2647 | 0.8748 |
| 45   | 65   | 0.8748 |
| 2932 | 2952 | 0.8748 |
| 2298 | 2318 | 0.8748 |
| 2623 | 2643 | 0.8747 |
| 2622 | 2642 | 0.8747 |
| 1983 | 2003 | 0.8747 |
| 1923 | 1943 | 0.8746 |
| 695  | 715  | 0.8746 |
| 1618 | 1638 | 0.8746 |
| 2621 | 2641 | 0.8746 |
| 798  | 818  | 0.8744 |
| 800  | 820  | 0.8744 |
| 2195 | 2215 | 0.8744 |

|      |      |        |
|------|------|--------|
| 801  | 821  | 0.8744 |
| 799  | 819  | 0.8744 |
| 190  | 210  | 0.8743 |
| 1021 | 1041 | 0.8743 |
| 195  | 215  | 0.8743 |
| 828  | 848  | 0.8743 |
| 1672 | 1692 | 0.8743 |
| 192  | 212  | 0.8743 |
| 1673 | 1693 | 0.8743 |
| 191  | 211  | 0.8743 |
| 773  | 793  | 0.8742 |
| 2608 | 2628 | 0.8742 |
| 772  | 792  | 0.8742 |
| 44   | 64   | 0.8740 |
| 2339 | 2359 | 0.8739 |
| 2340 | 2360 | 0.8739 |
| 2218 | 2238 | 0.8737 |
| 1928 | 1948 | 0.8736 |
| 697  | 717  | 0.8736 |
| 698  | 718  | 0.8736 |
| 2286 | 2306 | 0.8736 |
| 2311 | 2331 | 0.8735 |
| 2323 | 2343 | 0.8734 |
| 2322 | 2342 | 0.8734 |
| 2306 | 2326 | 0.8734 |
| 2324 | 2344 | 0.8734 |
| 2556 | 2576 | 0.8732 |
| 177  | 197  | 0.8731 |
| 3164 | 3184 | 0.8731 |
| 3165 | 3185 | 0.8731 |
| 3163 | 3183 | 0.8731 |
| 53   | 73   | 0.8727 |
| 558  | 578  | 0.8726 |
| 184  | 204  | 0.8726 |
| 54   | 74   | 0.8726 |
| 3193 | 3213 | 0.8726 |
| 559  | 579  | 0.8726 |
| 52   | 72   | 0.8726 |
| 185  | 205  | 0.8726 |
| 1010 | 1030 | 0.8725 |
| 1787 | 1807 | 0.8724 |
| 1789 | 1809 | 0.8724 |
| 1788 | 1808 | 0.8724 |
| 2437 | 2457 | 0.8722 |
| 12   | 32   | 0.8722 |
| 668  | 688  | 0.8722 |
| 2438 | 2458 | 0.8722 |
| 1008 | 1028 | 0.8721 |
| 665  | 685  | 0.8721 |
| 1600 | 1620 | 0.8721 |
| 1599 | 1619 | 0.8721 |
| 1009 | 1029 | 0.8721 |
| 1354 | 1374 | 0.8721 |
| 1007 | 1027 | 0.8720 |
| 1006 | 1026 | 0.8720 |
| 1601 | 1621 | 0.8720 |

|      |      |        |
|------|------|--------|
| 2548 | 2568 | 0.8720 |
| 2549 | 2569 | 0.8720 |
| 182  | 202  | 0.8717 |
| 180  | 200  | 0.8717 |
| 181  | 201  | 0.8717 |
| 121  | 141  | 0.8715 |
| 1615 | 1635 | 0.8715 |
| 1614 | 1634 | 0.8715 |
| 1822 | 1842 | 0.8712 |
| 1799 | 1819 | 0.8711 |
| 1542 | 1562 | 0.8710 |
| 1824 | 1844 | 0.8710 |
| 1818 | 1838 | 0.8707 |
| 1820 | 1840 | 0.8707 |
| 1816 | 1836 | 0.8707 |
| 3054 | 3074 | 0.8707 |
| 1817 | 1837 | 0.8707 |
| 1821 | 1841 | 0.8707 |
| 1815 | 1835 | 0.8707 |
| 1819 | 1839 | 0.8707 |
| 1930 | 1950 | 0.8706 |
| 3052 | 3072 | 0.8705 |
| 1081 | 1101 | 0.8704 |
| 3350 | 3370 | 0.8704 |
| 1079 | 1099 | 0.8704 |
| 1080 | 1100 | 0.8704 |
| 1063 | 1083 | 0.8703 |
| 2845 | 2865 | 0.8703 |
| 150  | 170  | 0.8702 |
| 3014 | 3034 | 0.8702 |
| 1811 | 1831 | 0.8701 |
| 370  | 390  | 0.8701 |
| 1352 | 1372 | 0.8697 |
| 1035 | 1055 | 0.8696 |
| 1034 | 1054 | 0.8696 |
| 3365 | 3385 | 0.8694 |
| 2647 | 2667 | 0.8689 |
| 2883 | 2903 | 0.8688 |
| 2881 | 2901 | 0.8686 |
| 2385 | 2405 | 0.8685 |
| 2387 | 2407 | 0.8684 |
| 2386 | 2406 | 0.8684 |
| 136  | 156  | 0.8683 |
| 137  | 157  | 0.8683 |
| 3320 | 3340 | 0.8682 |
| 3319 | 3339 | 0.8682 |
| 3321 | 3341 | 0.8682 |
| 3324 | 3344 | 0.8682 |
| 3322 | 3342 | 0.8682 |
| 3323 | 3343 | 0.8682 |
| 3308 | 3328 | 0.8681 |
| 3309 | 3329 | 0.8681 |
| 142  | 162  | 0.8680 |
| 215  | 235  | 0.8679 |
| 487  | 507  | 0.8679 |
| 214  | 234  | 0.8679 |

|      |      |        |
|------|------|--------|
| 1617 | 1637 | 0.8672 |
| 3353 | 3373 | 0.8672 |
| 3002 | 3022 | 0.8672 |
| 3352 | 3372 | 0.8670 |
| 930  | 950  | 0.8669 |
| 2034 | 2054 | 0.8668 |
| 1056 | 1076 | 0.8667 |
| 1057 | 1077 | 0.8667 |
| 282  | 302  | 0.8666 |
| 281  | 301  | 0.8666 |
| 280  | 300  | 0.8666 |
| 2733 | 2753 | 0.8663 |
| 2732 | 2752 | 0.8663 |
| 643  | 663  | 0.8657 |
| 2737 | 2757 | 0.8656 |
| 2736 | 2756 | 0.8655 |
| 2735 | 2755 | 0.8655 |
| 2734 | 2754 | 0.8655 |
| 273  | 293  | 0.8655 |
| 1658 | 1678 | 0.8649 |
| 1660 | 1680 | 0.8649 |
| 481  | 501  | 0.8649 |
| 1657 | 1677 | 0.8649 |
| 1012 | 1032 | 0.8647 |
| 1011 | 1031 | 0.8647 |
| 171  | 191  | 0.8645 |
| 2409 | 2429 | 0.8644 |
| 2410 | 2430 | 0.8644 |
| 2412 | 2432 | 0.8644 |
| 2078 | 2098 | 0.8644 |
| 297  | 317  | 0.8644 |
| 2411 | 2431 | 0.8644 |
| 2079 | 2099 | 0.8643 |
| 1018 | 1038 | 0.8642 |
| 1017 | 1037 | 0.8642 |
| 776  | 796  | 0.8638 |
| 58   | 78   | 0.8634 |
| 535  | 555  | 0.8633 |
| 373  | 393  | 0.8630 |
| 372  | 392  | 0.8630 |
| 1569 | 1589 | 0.8628 |
| 1568 | 1588 | 0.8628 |
| 1065 | 1085 | 0.8627 |
| 1066 | 1086 | 0.8627 |
| 2493 | 2513 | 0.8626 |
| 2494 | 2514 | 0.8626 |
| 1366 | 1386 | 0.8625 |
| 2790 | 2810 | 0.8625 |
| 1369 | 1389 | 0.8625 |
| 2294 | 2314 | 0.8624 |
| 2297 | 2317 | 0.8624 |
| 1363 | 1383 | 0.8624 |
| 2470 | 2490 | 0.8624 |
| 2295 | 2315 | 0.8624 |
| 2296 | 2316 | 0.8624 |
| 1365 | 1385 | 0.8624 |

|      |      |        |
|------|------|--------|
| 1361 | 1381 | 0.8623 |
| 3071 | 3091 | 0.8623 |
| 966  | 986  | 0.8623 |
| 1357 | 1377 | 0.8623 |
| 1359 | 1379 | 0.8623 |
| 3072 | 3092 | 0.8623 |
| 1360 | 1380 | 0.8623 |
| 3070 | 3090 | 0.8622 |
| 1925 | 1945 | 0.8621 |
| 1924 | 1944 | 0.8621 |
| 832  | 852  | 0.8621 |
| 2424 | 2444 | 0.8620 |
| 967  | 987  | 0.8620 |
| 797  | 817  | 0.8619 |
| 1805 | 1825 | 0.8618 |
| 193  | 213  | 0.8618 |
| 194  | 214  | 0.8618 |
| 2781 | 2801 | 0.8617 |
| 515  | 535  | 0.8617 |
| 2782 | 2802 | 0.8617 |
| 2780 | 2800 | 0.8617 |
| 2522 | 2542 | 0.8615 |
| 2521 | 2541 | 0.8615 |
| 3310 | 3330 | 0.8614 |
| 1594 | 1614 | 0.8612 |
| 1593 | 1613 | 0.8612 |
| 2288 | 2308 | 0.8611 |
| 2287 | 2307 | 0.8611 |
| 696  | 716  | 0.8611 |
| 2315 | 2335 | 0.8609 |
| 2709 | 2729 | 0.8608 |
| 2710 | 2730 | 0.8608 |
| 2554 | 2574 | 0.8607 |
| 2717 | 2737 | 0.8607 |
| 2555 | 2575 | 0.8607 |
| 2316 | 2336 | 0.8606 |
| 2317 | 2337 | 0.8605 |
| 2318 | 2338 | 0.8605 |
| 986  | 1006 | 0.8604 |
| 2544 | 2564 | 0.8603 |
| 2890 | 2910 | 0.8602 |
| 1106 | 1126 | 0.8601 |
| 1108 | 1128 | 0.8601 |
| 1107 | 1127 | 0.8601 |
| 2401 | 2421 | 0.8599 |
| 2720 | 2740 | 0.8599 |
| 2889 | 2909 | 0.8598 |
| 1781 | 1801 | 0.8598 |
| 667  | 687  | 0.8597 |
| 666  | 686  | 0.8596 |
| 1356 | 1376 | 0.8596 |
| 1355 | 1375 | 0.8596 |
| 878  | 898  | 0.8596 |
| 1019 | 1039 | 0.8595 |
| 2550 | 2570 | 0.8595 |
| 2551 | 2571 | 0.8594 |

|      |      |        |
|------|------|--------|
| 1948 | 1968 | 0.8594 |
| 1947 | 1967 | 0.8594 |
| 1949 | 1969 | 0.8594 |
| 2721 | 2741 | 0.8593 |
| 1946 | 1966 | 0.8593 |
| 3104 | 3124 | 0.8591 |
| 1574 | 1594 | 0.8589 |
| 3349 | 3369 | 0.8589 |
| 3348 | 3368 | 0.8588 |
| 3141 | 3161 | 0.8584 |
| 3143 | 3163 | 0.8584 |
| 3142 | 3162 | 0.8584 |
| 3055 | 3075 | 0.8582 |
| 3053 | 3073 | 0.8581 |
| 3009 | 3029 | 0.8577 |
| 3008 | 3028 | 0.8577 |
| 3010 | 3030 | 0.8577 |
| 3012 | 3032 | 0.8577 |
| 2194 | 2214 | 0.8577 |
| 3013 | 3033 | 0.8577 |
| 3011 | 3031 | 0.8577 |
| 1808 | 1828 | 0.8576 |
| 1807 | 1827 | 0.8576 |
| 1809 | 1829 | 0.8576 |
| 1062 | 1082 | 0.8573 |
| 3361 | 3381 | 0.8572 |
| 3362 | 3382 | 0.8572 |
| 3363 | 3383 | 0.8568 |
| 2269 | 2289 | 0.8568 |
| 2397 | 2417 | 0.8565 |
| 3029 | 3049 | 0.8564 |
| 135  | 155  | 0.8558 |
| 3317 | 3337 | 0.8557 |
| 15   | 35   | 0.8557 |
| 3318 | 3338 | 0.8557 |
| 3316 | 3336 | 0.8557 |
| 1518 | 1538 | 0.8556 |
| 16   | 36   | 0.8554 |
| 1042 | 1062 | 0.8553 |
| 1520 | 1540 | 0.8551 |
| 1522 | 1542 | 0.8551 |
| 1521 | 1541 | 0.8551 |
| 1523 | 1543 | 0.8550 |
| 1616 | 1636 | 0.8547 |
| 479  | 499  | 0.8546 |
| 464  | 484  | 0.8546 |
| 2543 | 2563 | 0.8544 |
| 2541 | 2561 | 0.8544 |
| 2542 | 2562 | 0.8544 |
| 284  | 304  | 0.8543 |
| 285  | 305  | 0.8543 |
| 216  | 236  | 0.8542 |
| 218  | 238  | 0.8542 |
| 3354 | 3374 | 0.8541 |
| 2524 | 2544 | 0.8541 |
| 275  | 295  | 0.8539 |

|      |      |        |
|------|------|--------|
| 2930 | 2950 | 0.8538 |
| 2731 | 2751 | 0.8538 |
| 278  | 298  | 0.8535 |
| 151  | 171  | 0.8535 |
| 781  | 801  | 0.8535 |
| 642  | 662  | 0.8531 |
| 311  | 331  | 0.8531 |
| 3360 | 3380 | 0.8530 |
| 2118 | 2138 | 0.8530 |
| 2119 | 2139 | 0.8530 |
| 2341 | 2361 | 0.8529 |
| 641  | 661  | 0.8529 |
| 272  | 292  | 0.8529 |
| 2491 | 2511 | 0.8528 |
| 2342 | 2362 | 0.8526 |
| 2344 | 2364 | 0.8526 |
| 482  | 502  | 0.8526 |
| 2343 | 2363 | 0.8526 |
| 2350 | 2370 | 0.8525 |
| 2349 | 2369 | 0.8525 |
| 2347 | 2367 | 0.8525 |
| 2345 | 2365 | 0.8525 |
| 2346 | 2366 | 0.8525 |
| 2348 | 2368 | 0.8525 |
| 2407 | 2427 | 0.8522 |
| 1013 | 1033 | 0.8521 |
| 2418 | 2438 | 0.8521 |
| 1014 | 1034 | 0.8521 |
| 2417 | 2437 | 0.8521 |
| 2413 | 2433 | 0.8519 |
| 2415 | 2435 | 0.8519 |
| 2414 | 2434 | 0.8519 |
| 2080 | 2100 | 0.8518 |
| 778  | 798  | 0.8517 |
| 55   | 75   | 0.8513 |
| 699  | 719  | 0.8510 |
| 700  | 720  | 0.8510 |
| 701  | 721  | 0.8510 |
| 59   | 79   | 0.8509 |
| 1509 | 1529 | 0.8507 |
| 1016 | 1036 | 0.8506 |
| 795  | 815  | 0.8506 |
| 1515 | 1535 | 0.8505 |
| 382  | 402  | 0.8503 |
| 338  | 358  | 0.8502 |
| 951  | 971  | 0.8502 |
| 340  | 360  | 0.8502 |
| 823  | 843  | 0.8500 |
| 1367 | 1387 | 0.8500 |
| 1054 | 1074 | 0.8500 |
| 1368 | 1388 | 0.8500 |
| 1055 | 1075 | 0.8500 |
| 1625 | 1645 | 0.8500 |
| 1566 | 1586 | 0.8499 |
| 2299 | 2319 | 0.8499 |
| 824  | 844  | 0.8499 |



|      |      |        |
|------|------|--------|
| 963  | 983  | 0.8498 |
| 1358 | 1378 | 0.8498 |
| 2301 | 2321 | 0.8498 |
| 2303 | 2323 | 0.8498 |
| 2305 | 2325 | 0.8498 |
| 2302 | 2322 | 0.8498 |
| 2304 | 2324 | 0.8498 |
| 833  | 853  | 0.8496 |
| 968  | 988  | 0.8496 |
| 834  | 854  | 0.8496 |
| 461  | 481  | 0.8496 |
| 796  | 816  | 0.8496 |
| 462  | 482  | 0.8496 |
| 457  | 477  | 0.8495 |
| 458  | 478  | 0.8495 |
| 836  | 856  | 0.8495 |
| 835  | 855  | 0.8495 |
| 2787 | 2807 | 0.8494 |
| 1536 | 1556 | 0.8494 |
| 2612 | 2632 | 0.8494 |
| 2611 | 2631 | 0.8493 |
| 456  | 476  | 0.8493 |
| 514  | 534  | 0.8492 |
| 41   | 61   | 0.8490 |
| 2219 | 2239 | 0.8490 |
| 2523 | 2543 | 0.8490 |
| 43   | 63   | 0.8490 |
| 42   | 62   | 0.8490 |
| 2619 | 2639 | 0.8489 |
| 2620 | 2640 | 0.8489 |
| 771  | 791  | 0.8486 |
| 2670 | 2690 | 0.8486 |
| 2671 | 2691 | 0.8485 |
| 2673 | 2693 | 0.8485 |
| 2672 | 2692 | 0.8485 |
| 2711 | 2731 | 0.8483 |
| 1020 | 1040 | 0.8483 |
| 2553 | 2573 | 0.8482 |
| 985  | 1005 | 0.8480 |
| 984  | 1004 | 0.8480 |
| 2891 | 2911 | 0.8479 |
| 916  | 936  | 0.8479 |
| 2499 | 2519 | 0.8479 |
| 1592 | 1612 | 0.8478 |
| 1591 | 1611 | 0.8478 |
| 561  | 581  | 0.8477 |
| 560  | 580  | 0.8477 |
| 562  | 582  | 0.8477 |
| 557  | 577  | 0.8475 |
| 2674 | 2694 | 0.8474 |
| 1790 | 1810 | 0.8474 |
| 1791 | 1811 | 0.8474 |
| 183  | 203  | 0.8473 |
| 1571 | 1591 | 0.8473 |
| 1572 | 1592 | 0.8473 |
| 11   | 31   | 0.8472 |

|      |      |        |
|------|------|--------|
| 2722 | 2742 | 0.8469 |
| 1944 | 1964 | 0.8468 |
| 1945 | 1965 | 0.8468 |
| 120  | 140  | 0.8466 |
| 119  | 139  | 0.8466 |
| 1342 | 1362 | 0.8465 |
| 346  | 366  | 0.8464 |
| 347  | 367  | 0.8462 |
| 114  | 134  | 0.8461 |
| 348  | 368  | 0.8461 |
| 1543 | 1563 | 0.8460 |
| 113  | 133  | 0.8459 |
| 1519 | 1539 | 0.8459 |
| 920  | 940  | 0.8457 |
| 1814 | 1834 | 0.8457 |
| 1931 | 1951 | 0.8456 |
| 2017 | 2037 | 0.8454 |
| 2015 | 2035 | 0.8454 |
| 1064 | 1084 | 0.8454 |
| 2016 | 2036 | 0.8454 |
| 1061 | 1081 | 0.8452 |
| 1813 | 1833 | 0.8452 |
| 1812 | 1832 | 0.8452 |
| 1806 | 1826 | 0.8451 |
| 369  | 389  | 0.8451 |
| 2878 | 2898 | 0.8450 |
| 2880 | 2900 | 0.8448 |
| 3366 | 3386 | 0.8444 |
| 2396 | 2416 | 0.8440 |
| 2394 | 2414 | 0.8439 |
| 2393 | 2413 | 0.8439 |
| 2395 | 2415 | 0.8439 |
| 2648 | 2668 | 0.8438 |
| 2677 | 2697 | 0.8436 |
| 2676 | 2696 | 0.8436 |
| 2388 | 2408 | 0.8435 |
| 134  | 154  | 0.8435 |
| 2391 | 2411 | 0.8435 |
| 133  | 153  | 0.8435 |
| 2392 | 2412 | 0.8435 |
| 2389 | 2409 | 0.8435 |
| 2390 | 2410 | 0.8435 |
| 2685 | 2705 | 0.8434 |
| 2686 | 2706 | 0.8434 |
| 138  | 158  | 0.8433 |
| 139  | 159  | 0.8433 |
| 1516 | 1536 | 0.8431 |
| 1517 | 1537 | 0.8431 |
| 644  | 664  | 0.8429 |
| 17   | 37   | 0.8429 |
| 1526 | 1546 | 0.8426 |
| 1525 | 1545 | 0.8426 |
| 1524 | 1544 | 0.8425 |
| 466  | 486  | 0.8422 |
| 3003 | 3023 | 0.8422 |
| 469  | 489  | 0.8422 |

|      |      |        |
|------|------|--------|
| 2729 | 2749 | 0.8421 |
| 477  | 497  | 0.8421 |
| 478  | 498  | 0.8421 |
| 931  | 951  | 0.8421 |
| 2540 | 2560 | 0.8419 |
| 219  | 239  | 0.8417 |
| 220  | 240  | 0.8417 |
| 217  | 237  | 0.8417 |
| 1058 | 1078 | 0.8417 |
| 283  | 303  | 0.8416 |
| 3355 | 3375 | 0.8416 |
| 2531 | 2551 | 0.8415 |
| 2528 | 2548 | 0.8415 |
| 2529 | 2549 | 0.8415 |
| 2530 | 2550 | 0.8415 |
| 2532 | 2552 | 0.8415 |
| 279  | 299  | 0.8414 |
| 227  | 247  | 0.8414 |
| 2730 | 2750 | 0.8414 |
| 222  | 242  | 0.8414 |
| 223  | 243  | 0.8413 |
| 2725 | 2745 | 0.8413 |
| 3357 | 3377 | 0.8413 |
| 2929 | 2949 | 0.8411 |
| 3358 | 3378 | 0.8410 |
| 3359 | 3379 | 0.8410 |
| 2535 | 2555 | 0.8409 |
| 2538 | 2558 | 0.8409 |
| 2534 | 2554 | 0.8409 |
| 2533 | 2553 | 0.8408 |
| 2539 | 2559 | 0.8408 |
| 4    | 24   | 0.8407 |
| 3    | 23   | 0.8407 |
| 5    | 25   | 0.8407 |
| 2    | 22   | 0.8407 |
| 2738 | 2758 | 0.8406 |
| 2739 | 2759 | 0.8406 |
| 3106 | 3126 | 0.8405 |
| 2928 | 2948 | 0.8405 |
| 2927 | 2947 | 0.8405 |
| 271  | 291  | 0.8404 |
| 270  | 290  | 0.8404 |
| 2131 | 2151 | 0.8404 |
| 2132 | 2152 | 0.8403 |
| 3006 | 3026 | 0.8403 |
| 3007 | 3027 | 0.8403 |
| 3005 | 3025 | 0.8403 |
| 3004 | 3024 | 0.8403 |
| 640  | 660  | 0.8402 |
| 1656 | 1676 | 0.8401 |
| 108  | 128  | 0.8399 |
| 2032 | 2052 | 0.8397 |
| 2416 | 2436 | 0.8396 |
| 2081 | 2101 | 0.8393 |
| 163  | 183  | 0.8390 |
| 56   | 76   | 0.8387 |

|      |      |        |
|------|------|--------|
| 57   | 77   | 0.8387 |
| 2293 | 2313 | 0.8387 |
| 3050 | 3070 | 0.8387 |
| 3051 | 3071 | 0.8386 |
| 2846 | 2866 | 0.8385 |
| 664  | 684  | 0.8385 |
| 536  | 556  | 0.8383 |
| 61   | 81   | 0.8383 |
| 60   | 80   | 0.8383 |
| 3311 | 3331 | 0.8380 |
| 513  | 533  | 0.8378 |
| 335  | 355  | 0.8377 |
| 337  | 357  | 0.8377 |
| 336  | 356  | 0.8377 |
| 2495 | 2515 | 0.8376 |
| 2520 | 2540 | 0.8376 |
| 1370 | 1390 | 0.8375 |
| 964  | 984  | 0.8373 |
| 131  | 151  | 0.8373 |
| 965  | 985  | 0.8373 |
| 132  | 152  | 0.8373 |
| 2300 | 2320 | 0.8373 |
| 1375 | 1395 | 0.8373 |
| 1376 | 1396 | 0.8373 |
| 1377 | 1397 | 0.8373 |
| 2779 | 2799 | 0.8372 |
| 2471 | 2491 | 0.8372 |
| 460  | 480  | 0.8371 |
| 1926 | 1946 | 0.8371 |
| 837  | 857  | 0.8370 |
| 109  | 129  | 0.8370 |
| 459  | 479  | 0.8370 |
| 1927 | 1947 | 0.8370 |
| 2789 | 2809 | 0.8369 |
| 802  | 822  | 0.8369 |
| 2788 | 2808 | 0.8369 |
| 2613 | 2633 | 0.8369 |
| 2609 | 2629 | 0.8368 |
| 2610 | 2630 | 0.8368 |
| 2220 | 2240 | 0.8365 |
| 2662 | 2682 | 0.8364 |
| 2617 | 2637 | 0.8364 |
| 2618 | 2638 | 0.8364 |
| 1466 | 1486 | 0.8364 |
| 2661 | 2681 | 0.8361 |
| 76   | 96   | 0.8361 |
| 2422 | 2442 | 0.8361 |
| 2421 | 2441 | 0.8361 |
| 2291 | 2311 | 0.8360 |
| 2289 | 2309 | 0.8360 |
| 2669 | 2689 | 0.8360 |
| 2290 | 2310 | 0.8360 |
| 2715 | 2735 | 0.8358 |
| 2716 | 2736 | 0.8358 |
| 2712 | 2732 | 0.8358 |
| 2423 | 2443 | 0.8358 |

|      |      |        |
|------|------|--------|
| 2713 | 2733 | 0.8358 |
| 983  | 1003 | 0.8355 |
| 170  | 190  | 0.8353 |
| 1792 | 1812 | 0.8350 |
| 1793 | 1813 | 0.8350 |
| 2740 | 2760 | 0.8350 |
| 2552 | 2572 | 0.8350 |
| 879  | 899  | 0.8349 |
| 880  | 900  | 0.8349 |
| 877  | 897  | 0.8348 |
| 10   | 30   | 0.8347 |
| 1474 | 1494 | 0.8346 |
| 2723 | 2743 | 0.8346 |
| 1109 | 1129 | 0.8345 |
| 1794 | 1814 | 0.8344 |
| 9    | 29   | 0.8344 |
| 122  | 142  | 0.8340 |
| 1110 | 1130 | 0.8340 |
| 1798 | 1818 | 0.8339 |
| 1341 | 1361 | 0.8339 |
| 488  | 508  | 0.8339 |
| 1573 | 1593 | 0.8339 |
| 118  | 138  | 0.8337 |
| 112  | 132  | 0.8335 |
| 115  | 135  | 0.8335 |
| 727  | 747  | 0.8327 |
| 2879 | 2899 | 0.8323 |
| 1576 | 1596 | 0.8321 |
| 1577 | 1597 | 0.8321 |
| 3315 | 3335 | 0.8320 |
| 2116 | 2136 | 0.8317 |
| 2117 | 2137 | 0.8317 |
| 3031 | 3051 | 0.8314 |
| 3030 | 3050 | 0.8314 |
| 563  | 583  | 0.8311 |
| 2675 | 2695 | 0.8310 |
| 2683 | 2703 | 0.8307 |
| 2684 | 2704 | 0.8307 |
| 140  | 160  | 0.8306 |
| 2649 | 2669 | 0.8305 |
| 971  | 991  | 0.8305 |
| 969  | 989  | 0.8305 |
| 141  | 161  | 0.8305 |
| 970  | 990  | 0.8305 |
| 18   | 38   | 0.8304 |
| 20   | 40   | 0.8304 |
| 19   | 39   | 0.8304 |
| 2525 | 2545 | 0.8298 |
| 1043 | 1063 | 0.8298 |
| 1535 | 1555 | 0.8298 |
| 471  | 491  | 0.8297 |
| 468  | 488  | 0.8297 |
| 467  | 487  | 0.8297 |
| 1044 | 1064 | 0.8297 |
| 465  | 485  | 0.8297 |
| 463  | 483  | 0.8296 |

|      |      |        |
|------|------|--------|
| 472  | 492  | 0.8296 |
| 221  | 241  | 0.8295 |
| 473  | 493  | 0.8295 |
| 1059 | 1079 | 0.8292 |
| 1060 | 1080 | 0.8292 |
| 2724 | 2744 | 0.8289 |
| 226  | 246  | 0.8289 |
| 780  | 800  | 0.8289 |
| 225  | 245  | 0.8289 |
| 224  | 244  | 0.8287 |
| 2193 | 2213 | 0.8286 |
| 2192 | 2212 | 0.8286 |
| 152  | 172  | 0.8285 |
| 2189 | 2209 | 0.8285 |
| 2727 | 2747 | 0.8285 |
| 2726 | 2746 | 0.8285 |
| 2536 | 2556 | 0.8284 |
| 2537 | 2557 | 0.8284 |
| 765  | 785  | 0.8283 |
| 268  | 288  | 0.8282 |
| 269  | 289  | 0.8282 |
| 1    | 21   | 0.8282 |
| 2125 | 2145 | 0.8281 |
| 2124 | 2144 | 0.8281 |
| 3105 | 3125 | 0.8281 |
| 2120 | 2140 | 0.8281 |
| 2129 | 2149 | 0.8281 |
| 663  | 683  | 0.8280 |
| 228  | 248  | 0.8279 |
| 2130 | 2150 | 0.8279 |
| 2133 | 2153 | 0.8278 |
| 72   | 92   | 0.8277 |
| 2490 | 2510 | 0.8276 |
| 1655 | 1675 | 0.8276 |
| 2489 | 2509 | 0.8275 |
| 312  | 332  | 0.8275 |
| 1653 | 1673 | 0.8274 |
| 2030 | 2050 | 0.8272 |
| 2917 | 2937 | 0.8272 |
| 2031 | 2051 | 0.8272 |
| 107  | 127  | 0.8272 |
| 2419 | 2439 | 0.8270 |
| 2921 | 2941 | 0.8270 |
| 2082 | 2102 | 0.8268 |
| 779  | 799  | 0.8267 |
| 702  | 722  | 0.8260 |
| 1507 | 1527 | 0.8256 |
| 1508 | 1528 | 0.8256 |
| 67   | 87   | 0.8255 |
| 950  | 970  | 0.8251 |
| 2895 | 2915 | 0.8251 |
| 2268 | 2288 | 0.8250 |
| 2896 | 2916 | 0.8250 |
| 1372 | 1392 | 0.8250 |
| 1374 | 1394 | 0.8249 |
| 819  | 839  | 0.8249 |

|      |      |        |
|------|------|--------|
| 822  | 842  | 0.8249 |
| 1564 | 1584 | 0.8249 |
| 820  | 840  | 0.8249 |
| 68   | 88   | 0.8249 |
| 130  | 150  | 0.8248 |
| 1626 | 1646 | 0.8248 |
| 2778 | 2798 | 0.8247 |
| 1378 | 1398 | 0.8247 |
| 1379 | 1399 | 0.8247 |
| 1380 | 1400 | 0.8247 |
| 267  | 287  | 0.8245 |
| 2614 | 2634 | 0.8244 |
| 2615 | 2635 | 0.8244 |
| 2616 | 2636 | 0.8244 |
| 454  | 474  | 0.8243 |
| 455  | 475  | 0.8243 |
| 110  | 130  | 0.8243 |
| 40   | 60   | 0.8240 |
| 39   | 59   | 0.8240 |
| 2517 | 2537 | 0.8240 |
| 1467 | 1487 | 0.8237 |
| 2664 | 2684 | 0.8237 |
| 2660 | 2680 | 0.8236 |
| 2714 | 2734 | 0.8233 |
| 2916 | 2936 | 0.8232 |
| 918  | 938  | 0.8232 |
| 917  | 937  | 0.8232 |
| 2915 | 2935 | 0.8231 |
| 2893 | 2913 | 0.8230 |
| 2914 | 2934 | 0.8230 |
| 2892 | 2912 | 0.8230 |
| 2498 | 2518 | 0.8229 |
| 914  | 934  | 0.8228 |
| 915  | 935  | 0.8228 |
| 2668 | 2688 | 0.8228 |
| 874  | 894  | 0.8227 |
| 875  | 895  | 0.8227 |
| 876  | 896  | 0.8227 |
| 169  | 189  | 0.8225 |
| 645  | 665  | 0.8224 |
| 1469 | 1489 | 0.8222 |
| 1943 | 1963 | 0.8219 |
| 3140 | 3160 | 0.8218 |
| 1472 | 1492 | 0.8218 |
| 345  | 365  | 0.8214 |
| 919  | 939  | 0.8212 |
| 1575 | 1595 | 0.8212 |
| 116  | 136  | 0.8212 |
| 117  | 137  | 0.8212 |
| 349  | 369  | 0.8211 |
| 1545 | 1565 | 0.8210 |
| 1544 | 1564 | 0.8210 |
| 1933 | 1953 | 0.8208 |
| 1932 | 1952 | 0.8208 |
| 3368 | 3388 | 0.8205 |
| 730  | 750  | 0.8203 |

|      |      |        |
|------|------|--------|
| 729  | 749  | 0.8203 |
| 368  | 388  | 0.8201 |
| 1588 | 1608 | 0.8199 |
| 1589 | 1609 | 0.8199 |
| 1590 | 1610 | 0.8198 |
| 1578 | 1598 | 0.8196 |
| 3313 | 3333 | 0.8195 |
| 3312 | 3332 | 0.8195 |
| 3314 | 3334 | 0.8195 |
| 770  | 790  | 0.8187 |
| 1383 | 1403 | 0.8187 |
| 769  | 789  | 0.8187 |
| 768  | 788  | 0.8187 |
| 2678 | 2698 | 0.8186 |
| 2679 | 2699 | 0.8186 |
| 564  | 584  | 0.8185 |
| 2681 | 2701 | 0.8181 |
| 2680 | 2700 | 0.8181 |
| 2020 | 2040 | 0.8176 |
| 2018 | 2038 | 0.8176 |
| 1527 | 1547 | 0.8176 |
| 2021 | 2041 | 0.8176 |
| 2019 | 2039 | 0.8176 |
| 1528 | 1548 | 0.8176 |
| 342  | 362  | 0.8174 |
| 341  | 361  | 0.8172 |
| 470  | 490  | 0.8172 |
| 932  | 952  | 0.8172 |
| 475  | 495  | 0.8171 |
| 474  | 494  | 0.8171 |
| 476  | 496  | 0.8171 |
| 760  | 780  | 0.8168 |
| 764  | 784  | 0.8167 |
| 3356 | 3376 | 0.8163 |
| 2188 | 2208 | 0.8161 |
| 2728 | 2748 | 0.8160 |
| 2190 | 2210 | 0.8160 |
| 0    | 20   | 0.8157 |
| 2126 | 2146 | 0.8156 |
| 2123 | 2143 | 0.8156 |
| 662  | 682  | 0.8155 |
| 2115 | 2135 | 0.8153 |
| 2926 | 2946 | 0.8152 |
| 1385 | 1405 | 0.8152 |
| 2925 | 2945 | 0.8152 |
| 2488 | 2508 | 0.8152 |
| 73   | 93   | 0.8151 |
| 2924 | 2944 | 0.8151 |
| 352  | 372  | 0.8150 |
| 106  | 126  | 0.8149 |
| 1652 | 1672 | 0.8149 |
| 2026 | 2046 | 0.8148 |
| 2028 | 2048 | 0.8148 |
| 74   | 94   | 0.8148 |
| 2027 | 2047 | 0.8148 |
| 2029 | 2049 | 0.8147 |



|      |      |        |
|------|------|--------|
| 2918 | 2938 | 0.8146 |
| 2919 | 2939 | 0.8146 |
| 2420 | 2440 | 0.8145 |
| 2920 | 2940 | 0.8145 |
| 2085 | 2105 | 0.8144 |
| 2086 | 2106 | 0.8144 |
| 2083 | 2103 | 0.8143 |
| 2084 | 2104 | 0.8143 |
| 62   | 82   | 0.8140 |
| 162  | 182  | 0.8140 |
| 63   | 83   | 0.8140 |
| 64   | 84   | 0.8140 |
| 161  | 181  | 0.8140 |
| 160  | 180  | 0.8139 |
| 164  | 184  | 0.8138 |
| 165  | 185  | 0.8138 |
| 3049 | 3069 | 0.8138 |
| 1053 | 1073 | 0.8135 |
| 2518 | 2538 | 0.8135 |
| 383  | 403  | 0.8132 |
| 6    | 26   | 0.8130 |
| 317  | 337  | 0.8128 |
| 2496 | 2516 | 0.8126 |
| 334  | 354  | 0.8126 |
| 1371 | 1391 | 0.8125 |
| 1565 | 1585 | 0.8124 |
| 1563 | 1583 | 0.8124 |
| 333  | 353  | 0.8124 |
| 510  | 530  | 0.8123 |
| 2847 | 2867 | 0.8122 |
| 2777 | 2797 | 0.8122 |
| 2472 | 2492 | 0.8122 |
| 838  | 858  | 0.8122 |
| 2848 | 2868 | 0.8122 |
| 2221 | 2241 | 0.8121 |
| 1381 | 1401 | 0.8121 |
| 556  | 576  | 0.8121 |
| 129  | 149  | 0.8121 |
| 266  | 286  | 0.8120 |
| 78   | 98   | 0.8120 |
| 512  | 532  | 0.8119 |
| 2134 | 2154 | 0.8119 |
| 2135 | 2155 | 0.8119 |
| 1382 | 1402 | 0.8119 |
| 111  | 131  | 0.8118 |
| 803  | 823  | 0.8118 |
| 804  | 824  | 0.8118 |
| 77   | 97   | 0.8117 |
| 37   | 57   | 0.8115 |
| 2653 | 2673 | 0.8114 |
| 2516 | 2536 | 0.8114 |
| 2663 | 2683 | 0.8112 |
| 1468 | 1488 | 0.8112 |
| 1465 | 1485 | 0.8112 |
| 35   | 55   | 0.8111 |
| 75   | 95   | 0.8111 |

|      |      |        |
|------|------|--------|
| 80   | 100  | 0.8111 |
| 2292 | 2312 | 0.8111 |
| 79   | 99   | 0.8111 |
| 2665 | 2685 | 0.8110 |
| 2666 | 2686 | 0.8110 |
| 2658 | 2678 | 0.8107 |
| 2659 | 2679 | 0.8107 |
| 982  | 1002 | 0.8106 |
| 2742 | 2762 | 0.8106 |
| 981  | 1001 | 0.8105 |
| 2744 | 2764 | 0.8105 |
| 2913 | 2933 | 0.8105 |
| 2912 | 2932 | 0.8105 |
| 2500 | 2520 | 0.8104 |
| 2655 | 2675 | 0.8103 |
| 2654 | 2674 | 0.8103 |
| 2656 | 2676 | 0.8102 |
| 2657 | 2677 | 0.8102 |
| 2667 | 2687 | 0.8102 |
| 1475 | 1495 | 0.8101 |
| 881  | 901  | 0.8100 |
| 2025 | 2045 | 0.8100 |
| 646  | 666  | 0.8099 |
| 882  | 902  | 0.8099 |
| 647  | 667  | 0.8098 |
| 2873 | 2893 | 0.8098 |
| 1473 | 1493 | 0.8096 |
| 906  | 926  | 0.8096 |
| 1796 | 1816 | 0.8094 |
| 1797 | 1817 | 0.8094 |
| 1795 | 1815 | 0.8094 |
| 2024 | 2044 | 0.8092 |
| 761  | 781  | 0.8091 |
| 974  | 994  | 0.8090 |
| 973  | 993  | 0.8089 |
| 972  | 992  | 0.8089 |
| 344  | 364  | 0.8089 |
| 1340 | 1360 | 0.8087 |
| 235  | 255  | 0.8084 |
| 975  | 995  | 0.8083 |
| 976  | 996  | 0.8083 |
| 3367 | 3387 | 0.8083 |
| 731  | 751  | 0.8078 |
| 728  | 748  | 0.8077 |
| 638  | 658  | 0.8077 |
| 726  | 746  | 0.8077 |
| 2877 | 2897 | 0.8076 |
| 734  | 754  | 0.8075 |
| 1586 | 1606 | 0.8074 |
| 1585 | 1605 | 0.8074 |
| 30   | 50   | 0.8074 |
| 1579 | 1599 | 0.8073 |
| 1580 | 1600 | 0.8073 |
| 1581 | 1601 | 0.8073 |
| 639  | 659  | 0.8070 |
| 2909 | 2929 | 0.8067 |

|      |      |        |
|------|------|--------|
| 759  | 779  | 0.8065 |
| 767  | 787  | 0.8063 |
| 766  | 786  | 0.8063 |
| 566  | 586  | 0.8060 |
| 2682 | 2702 | 0.8056 |
| 22   | 42   | 0.8054 |
| 23   | 43   | 0.8054 |
| 21   | 41   | 0.8054 |
| 2023 | 2043 | 0.8051 |
| 2022 | 2042 | 0.8051 |
| 1529 | 1549 | 0.8050 |
| 2526 | 2546 | 0.8048 |
| 1534 | 1554 | 0.8047 |
| 2527 | 2547 | 0.8040 |
| 2191 | 2211 | 0.8036 |
| 265  | 285  | 0.8036 |
| 412  | 432  | 0.8033 |
| 413  | 433  | 0.8032 |
| 2122 | 2142 | 0.8031 |
| 2121 | 2141 | 0.8031 |
| 2128 | 2148 | 0.8031 |
| 3107 | 3127 | 0.8031 |
| 71   | 91   | 0.8028 |
| 1387 | 1407 | 0.8027 |
| 1654 | 1674 | 0.8026 |
| 351  | 371  | 0.8025 |
| 2477 | 2497 | 0.8024 |
| 2474 | 2494 | 0.8024 |
| 2473 | 2493 | 0.8024 |
| 2476 | 2496 | 0.8024 |
| 2475 | 2495 | 0.8024 |
| 229  | 249  | 0.8024 |
| 2923 | 2943 | 0.8023 |
| 313  | 333  | 0.8022 |
| 104  | 124  | 0.8021 |
| 314  | 334  | 0.8021 |
| 2922 | 2942 | 0.8020 |
| 2114 | 2134 | 0.8019 |
| 166  | 186  | 0.8018 |
| 712  | 732  | 0.8013 |
| 713  | 733  | 0.8013 |
| 155  | 175  | 0.8011 |
| 159  | 179  | 0.8011 |
| 158  | 178  | 0.8011 |
| 2519 | 2539 | 0.8011 |
| 704  | 724  | 0.8010 |
| 703  | 723  | 0.8010 |
| 65   | 85   | 0.8009 |
| 1506 | 1526 | 0.8008 |
| 153  | 173  | 0.8008 |
| 537  | 557  | 0.8008 |
| 154  | 174  | 0.8008 |
| 8    | 28   | 0.8006 |
| 66   | 86   | 0.8006 |
| 167  | 187  | 0.8005 |
| 168  | 188  | 0.8005 |

|      |      |        |
|------|------|--------|
| 705  | 725  | 0.8003 |
| 318  | 338  | 0.8003 |
| 649  | 669  | 0.8000 |
| 1046 | 1066 | 0.8000 |
| 1045 | 1065 | 0.7999 |
| 949  | 969  | 0.7999 |
| 818  | 838  | 0.7999 |
| 69   | 89   | 0.7999 |
| 816  | 836  | 0.7999 |
| 817  | 837  | 0.7999 |
| 1373 | 1393 | 0.7999 |
| 821  | 841  | 0.7999 |
| 511  | 531  | 0.7998 |
| 1562 | 1582 | 0.7998 |
| 1627 | 1647 | 0.7997 |
| 1391 | 1411 | 0.7997 |
| 3032 | 3052 | 0.7995 |
| 659  | 679  | 0.7994 |
| 38   | 58   | 0.7990 |
| 36   | 56   | 0.7990 |
| 2652 | 2672 | 0.7990 |
| 2650 | 2670 | 0.7990 |
| 409  | 429  | 0.7987 |
| 1111 | 1131 | 0.7984 |
| 2894 | 2914 | 0.7981 |
| 980  | 1000 | 0.7981 |
| 2741 | 2761 | 0.7981 |
| 885  | 905  | 0.7981 |
| 2743 | 2763 | 0.7980 |
| 1477 | 1497 | 0.7977 |
| 873  | 893  | 0.7977 |
| 236  | 256  | 0.7974 |
| 648  | 668  | 0.7973 |
| 2874 | 2894 | 0.7972 |
| 1470 | 1490 | 0.7969 |
| 1471 | 1491 | 0.7968 |
| 763  | 783  | 0.7967 |
| 762  | 782  | 0.7967 |
| 124  | 144  | 0.7965 |
| 491  | 511  | 0.7965 |
| 123  | 143  | 0.7965 |
| 489  | 509  | 0.7964 |
| 126  | 146  | 0.7964 |
| 125  | 145  | 0.7964 |
| 343  | 363  | 0.7964 |
| 490  | 510  | 0.7964 |
| 2899 | 2919 | 0.7963 |
| 2900 | 2920 | 0.7963 |
| 350  | 370  | 0.7963 |
| 978  | 998  | 0.7961 |
| 1553 | 1573 | 0.7961 |
| 977  | 997  | 0.7961 |
| 2897 | 2917 | 0.7960 |
| 1552 | 1572 | 0.7959 |
| 234  | 254  | 0.7959 |
| 1934 | 1954 | 0.7958 |

|      |      |        |
|------|------|--------|
| 1936 | 1956 | 0.7958 |
| 1935 | 1955 | 0.7958 |
| 3369 | 3389 | 0.7955 |
| 910  | 930  | 0.7953 |
| 27   | 47   | 0.7952 |
| 28   | 48   | 0.7952 |
| 29   | 49   | 0.7952 |
| 725  | 745  | 0.7951 |
| 945  | 965  | 0.7951 |
| 634  | 654  | 0.7951 |
| 736  | 756  | 0.7950 |
| 735  | 755  | 0.7950 |
| 367  | 387  | 0.7950 |
| 911  | 931  | 0.7950 |
| 637  | 657  | 0.7950 |
| 1584 | 1604 | 0.7949 |
| 364  | 384  | 0.7949 |
| 365  | 385  | 0.7949 |
| 912  | 932  | 0.7949 |
| 363  | 383  | 0.7949 |
| 913  | 933  | 0.7949 |
| 31   | 51   | 0.7949 |
| 366  | 386  | 0.7949 |
| 1587 | 1607 | 0.7949 |
| 580  | 600  | 0.7949 |
| 907  | 927  | 0.7947 |
| 909  | 929  | 0.7947 |
| 2910 | 2930 | 0.7941 |
| 758  | 778  | 0.7940 |
| 944  | 964  | 0.7940 |
| 1496 | 1516 | 0.7940 |
| 1384 | 1404 | 0.7936 |
| 565  | 585  | 0.7935 |
| 567  | 587  | 0.7935 |
| 568  | 588  | 0.7934 |
| 406  | 426  | 0.7933 |
| 1531 | 1551 | 0.7924 |
| 1532 | 1552 | 0.7924 |
| 1530 | 1550 | 0.7924 |
| 1533 | 1553 | 0.7922 |
| 263  | 283  | 0.7915 |
| 661  | 681  | 0.7911 |
| 660  | 680  | 0.7911 |
| 2186 | 2206 | 0.7911 |
| 2187 | 2207 | 0.7910 |
| 942  | 962  | 0.7910 |
| 941  | 961  | 0.7910 |
| 939  | 959  | 0.7908 |
| 940  | 960  | 0.7908 |
| 2127 | 2147 | 0.7906 |
| 1386 | 1406 | 0.7902 |
| 2487 | 2507 | 0.7902 |
| 2486 | 2506 | 0.7902 |
| 81   | 101  | 0.7902 |
| 1114 | 1134 | 0.7900 |
| 1113 | 1133 | 0.7900 |

|      |      |        |
|------|------|--------|
| 353  | 373  | 0.7900 |
| 1115 | 1135 | 0.7900 |
| 105  | 125  | 0.7897 |
| 716  | 736  | 0.7896 |
| 717  | 737  | 0.7895 |
| 316  | 336  | 0.7895 |
| 2087 | 2107 | 0.7893 |
| 1388 | 1408 | 0.7893 |
| 933  | 953  | 0.7892 |
| 935  | 955  | 0.7892 |
| 934  | 954  | 0.7892 |
| 938  | 958  | 0.7889 |
| 937  | 957  | 0.7889 |
| 715  | 735  | 0.7886 |
| 157  | 177  | 0.7886 |
| 156  | 176  | 0.7886 |
| 384  | 404  | 0.7882 |
| 1051 | 1071 | 0.7882 |
| 1052 | 1072 | 0.7882 |
| 842  | 862  | 0.7881 |
| 1047 | 1067 | 0.7881 |
| 1050 | 1070 | 0.7880 |
| 7    | 27   | 0.7879 |
| 2267 | 2287 | 0.7875 |
| 2497 | 2517 | 0.7875 |
| 812  | 832  | 0.7874 |
| 813  | 833  | 0.7874 |
| 453  | 473  | 0.7874 |
| 814  | 834  | 0.7874 |
| 815  | 835  | 0.7874 |
| 545  | 565  | 0.7873 |
| 1393 | 1413 | 0.7873 |
| 323  | 343  | 0.7873 |
| 509  | 529  | 0.7873 |
| 2776 | 2796 | 0.7873 |
| 2089 | 2109 | 0.7872 |
| 1392 | 1412 | 0.7872 |
| 332  | 352  | 0.7871 |
| 2137 | 2157 | 0.7871 |
| 555  | 575  | 0.7871 |
| 2136 | 2156 | 0.7870 |
| 3033 | 3053 | 0.7869 |
| 719  | 739  | 0.7868 |
| 805  | 825  | 0.7868 |
| 720  | 740  | 0.7868 |
| 552  | 572  | 0.7865 |
| 2651 | 2671 | 0.7865 |
| 2515 | 2535 | 0.7864 |
| 886  | 906  | 0.7859 |
| 658  | 678  | 0.7856 |
| 657  | 677  | 0.7856 |
| 884  | 904  | 0.7855 |
| 2911 | 2931 | 0.7855 |
| 1481 | 1501 | 0.7853 |
| 1479 | 1499 | 0.7853 |
| 1480 | 1500 | 0.7853 |

|      |      |        |
|------|------|--------|
| 883  | 903  | 0.7853 |
| 1476 | 1496 | 0.7852 |
| 905  | 925  | 0.7849 |
| 904  | 924  | 0.7849 |
| 2870 | 2890 | 0.7848 |
| 239  | 259  | 0.7848 |
| 2871 | 2891 | 0.7846 |
| 2872 | 2892 | 0.7845 |
| 1942 | 1962 | 0.7844 |
| 3139 | 3159 | 0.7843 |
| 128  | 148  | 0.7842 |
| 127  | 147  | 0.7841 |
| 3370 | 3390 | 0.7840 |
| 492  | 512  | 0.7840 |
| 1941 | 1961 | 0.7839 |
| 2901 | 2921 | 0.7837 |
| 2902 | 2922 | 0.7837 |
| 1338 | 1358 | 0.7837 |
| 1939 | 1959 | 0.7837 |
| 1938 | 1958 | 0.7837 |
| 1940 | 1960 | 0.7836 |
| 1546 | 1566 | 0.7836 |
| 2898 | 2918 | 0.7835 |
| 2903 | 2923 | 0.7834 |
| 1550 | 1570 | 0.7834 |
| 1551 | 1571 | 0.7834 |
| 2113 | 2133 | 0.7833 |
| 1549 | 1569 | 0.7833 |
| 1547 | 1567 | 0.7832 |
| 2159 | 2179 | 0.7831 |
| 732  | 752  | 0.7828 |
| 733  | 753  | 0.7826 |
| 722  | 742  | 0.7826 |
| 635  | 655  | 0.7826 |
| 26   | 46   | 0.7826 |
| 723  | 743  | 0.7826 |
| 2906 | 2926 | 0.7825 |
| 636  | 656  | 0.7824 |
| 1582 | 1602 | 0.7824 |
| 578  | 598  | 0.7824 |
| 579  | 599  | 0.7824 |
| 577  | 597  | 0.7824 |
| 2239 | 2259 | 0.7823 |
| 2908 | 2928 | 0.7823 |
| 32   | 52   | 0.7823 |
| 33   | 53   | 0.7822 |
| 34   | 54   | 0.7822 |
| 1192 | 1212 | 0.7822 |
| 943  | 963  | 0.7815 |
| 1495 | 1515 | 0.7812 |
| 414  | 434  | 0.7812 |
| 2849 | 2869 | 0.7810 |
| 405  | 425  | 0.7805 |
| 404  | 424  | 0.7805 |
| 24   | 44   | 0.7804 |
| 575  | 595  | 0.7803 |

|      |      |        |
|------|------|--------|
| 574  | 594  | 0.7803 |
| 576  | 596  | 0.7803 |
| 407  | 427  | 0.7803 |
| 589  | 609  | 0.7788 |
| 264  | 284  | 0.7788 |
| 3108 | 3128 | 0.7782 |
| 1116 | 1136 | 0.7777 |
| 2485 | 2505 | 0.7777 |
| 588  | 608  | 0.7776 |
| 70   | 90   | 0.7776 |
| 82   | 102  | 0.7775 |
| 230  | 250  | 0.7774 |
| 231  | 251  | 0.7774 |
| 1651 | 1671 | 0.7774 |
| 1112 | 1132 | 0.7772 |
| 233  | 253  | 0.7772 |
| 315  | 335  | 0.7770 |
| 2088 | 2108 | 0.7768 |
| 3048 | 3068 | 0.7768 |
| 936  | 956  | 0.7767 |
| 411  | 431  | 0.7765 |
| 710  | 730  | 0.7762 |
| 711  | 731  | 0.7762 |
| 714  | 734  | 0.7761 |
| 1504 | 1524 | 0.7760 |
| 1505 | 1525 | 0.7759 |
| 539  | 559  | 0.7757 |
| 538  | 558  | 0.7757 |
| 841  | 861  | 0.7756 |
| 542  | 562  | 0.7756 |
| 543  | 563  | 0.7756 |
| 544  | 564  | 0.7756 |
| 843  | 863  | 0.7755 |
| 3047 | 3067 | 0.7754 |
| 320  | 340  | 0.7753 |
| 319  | 339  | 0.7753 |
| 706  | 726  | 0.7752 |
| 2222 | 2242 | 0.7751 |
| 321  | 341  | 0.7750 |
| 2746 | 2766 | 0.7750 |
| 633  | 653  | 0.7750 |
| 1464 | 1484 | 0.7749 |
| 508  | 528  | 0.7748 |
| 546  | 566  | 0.7748 |
| 324  | 344  | 0.7748 |
| 322  | 342  | 0.7748 |
| 593  | 613  | 0.7747 |
| 1389 | 1409 | 0.7747 |
| 839  | 859  | 0.7747 |
| 1390 | 1410 | 0.7747 |
| 888  | 908  | 0.7746 |
| 2769 | 2789 | 0.7746 |
| 2745 | 2765 | 0.7745 |
| 1628 | 1648 | 0.7745 |
| 594  | 614  | 0.7745 |
| 887  | 907  | 0.7745 |



|      |      |        |
|------|------|--------|
| 3035 | 3055 | 0.7743 |
| 806  | 826  | 0.7743 |
| 3034 | 3054 | 0.7743 |
| 2502 | 2522 | 0.7741 |
| 2501 | 2521 | 0.7741 |
| 2503 | 2523 | 0.7741 |
| 554  | 574  | 0.7740 |
| 331  | 351  | 0.7740 |
| 2513 | 2533 | 0.7740 |
| 650  | 670  | 0.7739 |
| 651  | 671  | 0.7739 |
| 410  | 430  | 0.7737 |
| 656  | 676  | 0.7734 |
| 655  | 675  | 0.7732 |
| 327  | 347  | 0.7732 |
| 326  | 346  | 0.7732 |
| 330  | 350  | 0.7731 |
| 1483 | 1503 | 0.7728 |
| 1478 | 1498 | 0.7727 |
| 237  | 257  | 0.7725 |
| 241  | 261  | 0.7724 |
| 238  | 258  | 0.7723 |
| 240  | 260  | 0.7723 |
| 415  | 435  | 0.7719 |
| 1339 | 1359 | 0.7712 |
| 1555 | 1575 | 0.7711 |
| 1554 | 1574 | 0.7711 |
| 738  | 758  | 0.7709 |
| 743  | 763  | 0.7708 |
| 1937 | 1957 | 0.7707 |
| 1548 | 1568 | 0.7707 |
| 2904 | 2924 | 0.7706 |
| 2160 | 2180 | 0.7706 |
| 2240 | 2260 | 0.7705 |
| 2905 | 2925 | 0.7705 |
| 3138 | 3158 | 0.7704 |
| 724  | 744  | 0.7701 |
| 2875 | 2895 | 0.7701 |
| 721  | 741  | 0.7701 |
| 103  | 123  | 0.7701 |
| 737  | 757  | 0.7701 |
| 2876 | 2896 | 0.7701 |
| 756  | 776  | 0.7700 |
| 2241 | 2261 | 0.7699 |
| 1583 | 1603 | 0.7699 |
| 946  | 966  | 0.7699 |
| 581  | 601  | 0.7699 |
| 757  | 777  | 0.7698 |
| 908  | 928  | 0.7697 |
| 2242 | 2262 | 0.7695 |
| 1493 | 1513 | 0.7686 |
| 571  | 591  | 0.7685 |
| 1191 | 1211 | 0.7683 |
| 1190 | 1210 | 0.7683 |
| 1189 | 1209 | 0.7682 |
| 570  | 590  | 0.7682 |

|      |      |        |
|------|------|--------|
| 408  | 428  | 0.7682 |
| 573  | 593  | 0.7678 |
| 25   | 45   | 0.7677 |
| 262  | 282  | 0.7664 |
| 2185 | 2205 | 0.7661 |
| 354  | 374  | 0.7650 |
| 1650 | 1670 | 0.7649 |
| 2478 | 2498 | 0.7649 |
| 232  | 252  | 0.7647 |
| 628  | 648  | 0.7646 |
| 718  | 738  | 0.7645 |
| 709  | 729  | 0.7638 |
| 3046 | 3066 | 0.7636 |
| 2090 | 2110 | 0.7636 |
| 847  | 867  | 0.7633 |
| 844  | 864  | 0.7632 |
| 385  | 405  | 0.7632 |
| 540  | 560  | 0.7631 |
| 541  | 561  | 0.7631 |
| 1049 | 1069 | 0.7630 |
| 1048 | 1068 | 0.7630 |
| 708  | 728  | 0.7628 |
| 2142 | 2162 | 0.7627 |
| 1337 | 1357 | 0.7627 |
| 811  | 831  | 0.7627 |
| 2141 | 2161 | 0.7627 |
| 2748 | 2768 | 0.7626 |
| 2747 | 2767 | 0.7625 |
| 632  | 652  | 0.7625 |
| 1395 | 1415 | 0.7624 |
| 948  | 968  | 0.7624 |
| 1561 | 1581 | 0.7623 |
| 596  | 616  | 0.7623 |
| 595  | 615  | 0.7623 |
| 1394 | 1414 | 0.7623 |
| 1462 | 1482 | 0.7623 |
| 451  | 471  | 0.7623 |
| 325  | 345  | 0.7623 |
| 547  | 567  | 0.7623 |
| 452  | 472  | 0.7623 |
| 592  | 612  | 0.7622 |
| 840  | 860  | 0.7622 |
| 2773 | 2793 | 0.7622 |
| 2770 | 2790 | 0.7622 |
| 2775 | 2795 | 0.7622 |
| 2774 | 2794 | 0.7622 |
| 631  | 651  | 0.7622 |
| 2768 | 2788 | 0.7621 |
| 893  | 913  | 0.7619 |
| 892  | 912  | 0.7619 |
| 2511 | 2531 | 0.7616 |
| 2510 | 2530 | 0.7616 |
| 2512 | 2532 | 0.7616 |
| 553  | 573  | 0.7615 |
| 2266 | 2286 | 0.7615 |
| 2514 | 2534 | 0.7614 |

|      |      |        |
|------|------|--------|
| 361  | 381  | 0.7614 |
| 362  | 382  | 0.7614 |
| 652  | 672  | 0.7612 |
| 3372 | 3392 | 0.7609 |
| 3373 | 3393 | 0.7609 |
| 329  | 349  | 0.7607 |
| 871  | 891  | 0.7606 |
| 979  | 999  | 0.7606 |
| 1207 | 1227 | 0.7603 |
| 1482 | 1502 | 0.7603 |
| 2869 | 2889 | 0.7602 |
| 872  | 892  | 0.7602 |
| 900  | 920  | 0.7600 |
| 903  | 923  | 0.7599 |
| 2107 | 2127 | 0.7598 |
| 2108 | 2128 | 0.7598 |
| 899  | 919  | 0.7594 |
| 494  | 514  | 0.7592 |
| 1560 | 1580 | 0.7590 |
| 739  | 759  | 0.7587 |
| 2112 | 2132 | 0.7583 |
| 2158 | 2178 | 0.7583 |
| 2110 | 2130 | 0.7583 |
| 493  | 513  | 0.7581 |
| 2161 | 2181 | 0.7580 |
| 2235 | 2255 | 0.7580 |
| 3371 | 3391 | 0.7576 |
| 755  | 775  | 0.7575 |
| 1193 | 1213 | 0.7572 |
| 2907 | 2927 | 0.7572 |
| 1503 | 1523 | 0.7570 |
| 1502 | 1522 | 0.7570 |
| 1184 | 1204 | 0.7569 |
| 1195 | 1215 | 0.7565 |
| 1498 | 1518 | 0.7565 |
| 1497 | 1517 | 0.7565 |
| 1494 | 1514 | 0.7562 |
| 1491 | 1511 | 0.7561 |
| 2850 | 2870 | 0.7560 |
| 2852 | 2872 | 0.7560 |
| 2851 | 2871 | 0.7560 |
| 569  | 589  | 0.7559 |
| 403  | 423  | 0.7555 |
| 590  | 610  | 0.7540 |
| 1484 | 1504 | 0.7538 |
| 1485 | 1505 | 0.7538 |
| 1499 | 1519 | 0.7536 |
| 3109 | 3129 | 0.7532 |
| 450  | 470  | 0.7530 |
| 2484 | 2504 | 0.7527 |
| 1118 | 1138 | 0.7527 |
| 1117 | 1137 | 0.7527 |
| 587  | 607  | 0.7526 |
| 2482 | 2502 | 0.7526 |
| 2483 | 2503 | 0.7526 |
| 749  | 769  | 0.7516 |

|      |      |        |
|------|------|--------|
| 750  | 770  | 0.7516 |
| 748  | 768  | 0.7516 |
| 1120 | 1140 | 0.7515 |
| 744  | 764  | 0.7508 |
| 386  | 406  | 0.7504 |
| 387  | 407  | 0.7504 |
| 2140 | 2160 | 0.7502 |
| 707  | 727  | 0.7502 |
| 808  | 828  | 0.7502 |
| 2749 | 2769 | 0.7501 |
| 2138 | 2158 | 0.7501 |
| 947  | 967  | 0.7499 |
| 2184 | 2204 | 0.7499 |
| 1463 | 1483 | 0.7498 |
| 597  | 617  | 0.7498 |
| 807  | 827  | 0.7497 |
| 551  | 571  | 0.7497 |
| 889  | 909  | 0.7496 |
| 1629 | 1649 | 0.7495 |
| 2243 | 2263 | 0.7495 |
| 630  | 650  | 0.7494 |
| 629  | 649  | 0.7494 |
| 2504 | 2524 | 0.7493 |
| 2507 | 2527 | 0.7493 |
| 2505 | 2525 | 0.7493 |
| 2506 | 2526 | 0.7493 |
| 3374 | 3394 | 0.7492 |
| 3036 | 3056 | 0.7492 |
| 3375 | 3395 | 0.7491 |
| 890  | 910  | 0.7490 |
| 891  | 911  | 0.7490 |
| 653  | 673  | 0.7486 |
| 848  | 868  | 0.7482 |
| 328  | 348  | 0.7482 |
| 654  | 674  | 0.7482 |
| 901  | 921  | 0.7477 |
| 1205 | 1225 | 0.7476 |
| 416  | 436  | 0.7469 |
| 1558 | 1578 | 0.7467 |
| 495  | 515  | 0.7467 |
| 1556 | 1576 | 0.7467 |
| 1557 | 1577 | 0.7467 |
| 1559 | 1579 | 0.7465 |
| 740  | 760  | 0.7462 |
| 2157 | 2177 | 0.7462 |
| 741  | 761  | 0.7459 |
| 2111 | 2131 | 0.7458 |
| 742  | 762  | 0.7458 |
| 2237 | 2257 | 0.7457 |
| 2236 | 2256 | 0.7457 |
| 2163 | 2183 | 0.7457 |
| 2162 | 2182 | 0.7455 |
| 1194 | 1214 | 0.7454 |
| 2164 | 2184 | 0.7452 |
| 3137 | 3157 | 0.7452 |
| 2223 | 2243 | 0.7451 |

|      |      |        |
|------|------|--------|
| 2238 | 2258 | 0.7450 |
| 582  | 602  | 0.7449 |
| 2230 | 2250 | 0.7447 |
| 1500 | 1520 | 0.7445 |
| 1185 | 1205 | 0.7443 |
| 1186 | 1206 | 0.7441 |
| 1187 | 1207 | 0.7441 |
| 1197 | 1217 | 0.7441 |
| 1188 | 1208 | 0.7440 |
| 1183 | 1203 | 0.7438 |
| 1492 | 1512 | 0.7436 |
| 1490 | 1510 | 0.7435 |
| 1489 | 1509 | 0.7432 |
| 572  | 592  | 0.7428 |
| 1488 | 1508 | 0.7418 |
| 507  | 527  | 0.7407 |
| 585  | 605  | 0.7401 |
| 586  | 606  | 0.7401 |
| 2480 | 2500 | 0.7401 |
| 2481 | 2501 | 0.7401 |
| 584  | 604  | 0.7401 |
| 355  | 375  | 0.7400 |
| 2479 | 2499 | 0.7400 |
| 83   | 103  | 0.7400 |
| 1649 | 1669 | 0.7399 |
| 627  | 647  | 0.7395 |
| 394  | 414  | 0.7391 |
| 747  | 767  | 0.7391 |
| 395  | 415  | 0.7391 |
| 746  | 766  | 0.7391 |
| 1121 | 1141 | 0.7390 |
| 2091 | 2111 | 0.7386 |
| 2092 | 2112 | 0.7386 |
| 846  | 866  | 0.7384 |
| 845  | 865  | 0.7382 |
| 2751 | 2771 | 0.7377 |
| 810  | 830  | 0.7377 |
| 809  | 829  | 0.7377 |
| 2752 | 2772 | 0.7377 |
| 2750 | 2770 | 0.7376 |
| 1398 | 1418 | 0.7375 |
| 388  | 408  | 0.7375 |
| 2146 | 2166 | 0.7375 |
| 2143 | 2163 | 0.7375 |
| 2147 | 2167 | 0.7375 |
| 1397 | 1417 | 0.7374 |
| 550  | 570  | 0.7374 |
| 548  | 568  | 0.7374 |
| 1396 | 1416 | 0.7374 |
| 549  | 569  | 0.7374 |
| 1460 | 1480 | 0.7373 |
| 1461 | 1481 | 0.7373 |
| 2771 | 2791 | 0.7372 |
| 1458 | 1478 | 0.7371 |
| 2767 | 2787 | 0.7371 |
| 1459 | 1479 | 0.7370 |

|      |      |        |
|------|------|--------|
| 3039 | 3059 | 0.7369 |
| 2509 | 2529 | 0.7367 |
| 583  | 603  | 0.7366 |
| 591  | 611  | 0.7365 |
| 1214 | 1234 | 0.7362 |
| 870  | 890  | 0.7358 |
| 869  | 889  | 0.7358 |
| 242  | 262  | 0.7355 |
| 1206 | 1226 | 0.7353 |
| 3045 | 3065 | 0.7350 |
| 2109 | 2129 | 0.7348 |
| 2103 | 2123 | 0.7347 |
| 2106 | 2126 | 0.7347 |
| 2102 | 2122 | 0.7347 |
| 751  | 771  | 0.7342 |
| 895  | 915  | 0.7340 |
| 2155 | 2175 | 0.7340 |
| 2154 | 2174 | 0.7340 |
| 894  | 914  | 0.7340 |
| 2156 | 2176 | 0.7339 |
| 753  | 773  | 0.7334 |
| 752  | 772  | 0.7332 |
| 2234 | 2254 | 0.7330 |
| 102  | 122  | 0.7326 |
| 754  | 774  | 0.7325 |
| 2227 | 2247 | 0.7323 |
| 2226 | 2246 | 0.7323 |
| 2224 | 2244 | 0.7323 |
| 2228 | 2248 | 0.7323 |
| 2225 | 2245 | 0.7323 |
| 2229 | 2249 | 0.7323 |
| 2232 | 2252 | 0.7322 |
| 2231 | 2251 | 0.7322 |
| 1501 | 1521 | 0.7320 |
| 2171 | 2191 | 0.7316 |
| 1196 | 1216 | 0.7315 |
| 402  | 422  | 0.7309 |
| 2854 | 2874 | 0.7307 |
| 2853 | 2873 | 0.7307 |
| 2855 | 2875 | 0.7307 |
| 2856 | 2876 | 0.7307 |
| 1216 | 1236 | 0.7302 |
| 1122 | 1142 | 0.7293 |
| 2868 | 2888 | 0.7291 |
| 2867 | 2887 | 0.7291 |
| 258  | 278  | 0.7291 |
| 257  | 277  | 0.7289 |
| 261  | 281  | 0.7289 |
| 1486 | 1506 | 0.7288 |
| 3110 | 3130 | 0.7283 |
| 360  | 380  | 0.7280 |
| 1443 | 1463 | 0.7279 |
| 1336 | 1356 | 0.7279 |
| 1441 | 1461 | 0.7279 |
| 2866 | 2886 | 0.7277 |
| 506  | 526  | 0.7274 |

|      |      |        |
|------|------|--------|
| 449  | 469  | 0.7267 |
| 745  | 765  | 0.7266 |
| 393  | 413  | 0.7266 |
| 1119 | 1139 | 0.7265 |
| 421  | 441  | 0.7265 |
| 2139 | 2159 | 0.7253 |
| 2145 | 2165 | 0.7250 |
| 2265 | 2285 | 0.7250 |
| 1399 | 1419 | 0.7249 |
| 598  | 618  | 0.7248 |
| 2772 | 2792 | 0.7247 |
| 1630 | 1650 | 0.7246 |
| 2766 | 2786 | 0.7246 |
| 2183 | 2203 | 0.7245 |
| 3038 | 3058 | 0.7244 |
| 1215 | 1235 | 0.7240 |
| 505  | 525  | 0.7238 |
| 502  | 522  | 0.7236 |
| 501  | 521  | 0.7235 |
| 244  | 264  | 0.7230 |
| 1208 | 1228 | 0.7229 |
| 1201 | 1221 | 0.7229 |
| 902  | 922  | 0.7228 |
| 3043 | 3063 | 0.7226 |
| 1204 | 1224 | 0.7226 |
| 3042 | 3062 | 0.7226 |
| 3044 | 3064 | 0.7225 |
| 2105 | 2125 | 0.7222 |
| 2104 | 2124 | 0.7222 |
| 849  | 869  | 0.7220 |
| 850  | 870  | 0.7220 |
| 898  | 918  | 0.7219 |
| 496  | 516  | 0.7217 |
| 1456 | 1476 | 0.7212 |
| 419  | 439  | 0.7209 |
| 420  | 440  | 0.7209 |
| 2173 | 2193 | 0.7206 |
| 2233 | 2253 | 0.7205 |
| 85   | 105  | 0.7203 |
| 1199 | 1219 | 0.7196 |
| 1198 | 1218 | 0.7191 |
| 3136 | 3156 | 0.7179 |
| 427  | 447  | 0.7178 |
| 428  | 448  | 0.7178 |
| 425  | 445  | 0.7174 |
| 426  | 446  | 0.7173 |
| 2165 | 2185 | 0.7168 |
| 2169 | 2189 | 0.7168 |
| 2170 | 2190 | 0.7168 |
| 2167 | 2187 | 0.7168 |
| 2168 | 2188 | 0.7167 |
| 259  | 279  | 0.7166 |
| 1487 | 1507 | 0.7166 |
| 1448 | 1468 | 0.7161 |
| 1451 | 1471 | 0.7160 |
| 1335 | 1355 | 0.7154 |

|      |      |        |
|------|------|--------|
| 1440 | 1460 | 0.7151 |
| 1648 | 1668 | 0.7149 |
| 400  | 420  | 0.7147 |
| 626  | 646  | 0.7144 |
| 448  | 468  | 0.7143 |
| 396  | 416  | 0.7141 |
| 398  | 418  | 0.7141 |
| 397  | 417  | 0.7141 |
| 2761 | 2781 | 0.7140 |
| 2762 | 2782 | 0.7140 |
| 2763 | 2783 | 0.7137 |
| 2093 | 2113 | 0.7136 |
| 2754 | 2774 | 0.7134 |
| 2148 | 2168 | 0.7125 |
| 2144 | 2164 | 0.7125 |
| 601  | 621  | 0.7123 |
| 2244 | 2264 | 0.7123 |
| 2765 | 2785 | 0.7123 |
| 1631 | 1651 | 0.7121 |
| 2181 | 2201 | 0.7120 |
| 1426 | 1446 | 0.7120 |
| 2182 | 2202 | 0.7120 |
| 3037 | 3057 | 0.7119 |
| 2508 | 2528 | 0.7118 |
| 1211 | 1231 | 0.7117 |
| 1210 | 1230 | 0.7117 |
| 1213 | 1233 | 0.7111 |
| 1200 | 1220 | 0.7106 |
| 243  | 263  | 0.7105 |
| 2152 | 2172 | 0.7105 |
| 2151 | 2171 | 0.7104 |
| 2860 | 2880 | 0.7103 |
| 1203 | 1223 | 0.7102 |
| 422  | 442  | 0.7101 |
| 1202 | 1222 | 0.7101 |
| 443  | 463  | 0.7098 |
| 2101 | 2121 | 0.7097 |
| 852  | 872  | 0.7097 |
| 868  | 888  | 0.7096 |
| 897  | 917  | 0.7094 |
| 417  | 437  | 0.7094 |
| 859  | 879  | 0.7094 |
| 418  | 438  | 0.7093 |
| 497  | 517  | 0.7092 |
| 896  | 916  | 0.7090 |
| 500  | 520  | 0.7089 |
| 499  | 519  | 0.7089 |
| 2153 | 2173 | 0.7089 |
| 498  | 518  | 0.7089 |
| 1457 | 1477 | 0.7087 |
| 861  | 881  | 0.7082 |
| 84   | 104  | 0.7080 |
| 1182 | 1202 | 0.7066 |
| 3040 | 3060 | 0.7066 |
| 2172 | 2192 | 0.7065 |
| 3112 | 3132 | 0.7063 |



|      |      |        |
|------|------|--------|
| 390  | 410  | 0.7061 |
| 389  | 409  | 0.7061 |
| 1217 | 1237 | 0.7052 |
| 1452 | 1472 | 0.7044 |
| 1123 | 1143 | 0.7043 |
| 1124 | 1144 | 0.7042 |
| 1447 | 1467 | 0.7039 |
| 260  | 280  | 0.7039 |
| 2859 | 2879 | 0.7035 |
| 3111 | 3131 | 0.7035 |
| 391  | 411  | 0.7034 |
| 359  | 379  | 0.7030 |
| 357  | 377  | 0.7030 |
| 358  | 378  | 0.7030 |
| 356  | 376  | 0.7030 |
| 1442 | 1462 | 0.7029 |
| 1444 | 1464 | 0.7028 |
| 1334 | 1354 | 0.7027 |
| 399  | 419  | 0.7024 |
| 392  | 412  | 0.7016 |
| 2755 | 2775 | 0.7009 |
| 2753 | 2773 | 0.7002 |
| 2150 | 2170 | 0.7002 |
| 602  | 622  | 0.7001 |
| 2149 | 2169 | 0.7000 |
| 599  | 619  | 0.6999 |
| 1400 | 1420 | 0.6999 |
| 1425 | 1445 | 0.6995 |
| 100  | 120  | 0.6995 |
| 1634 | 1654 | 0.6995 |
| 1424 | 1444 | 0.6994 |
| 1209 | 1229 | 0.6992 |
| 2862 | 2882 | 0.6992 |
| 1636 | 1656 | 0.6992 |
| 2863 | 2883 | 0.6991 |
| 2861 | 2881 | 0.6990 |
| 97   | 117  | 0.6989 |
| 504  | 524  | 0.6987 |
| 503  | 523  | 0.6986 |
| 245  | 265  | 0.6981 |
| 851  | 871  | 0.6972 |
| 2100 | 2120 | 0.6972 |
| 860  | 880  | 0.6968 |
| 423  | 443  | 0.6968 |
| 442  | 462  | 0.6965 |
| 1455 | 1475 | 0.6962 |
| 2865 | 2885 | 0.6959 |
| 90   | 110  | 0.6958 |
| 863  | 883  | 0.6958 |
| 862  | 882  | 0.6957 |
| 865  | 885  | 0.6955 |
| 101  | 121  | 0.6955 |
| 86   | 106  | 0.6954 |
| 3041 | 3061 | 0.6954 |
| 1181 | 1201 | 0.6947 |
| 401  | 421  | 0.6937 |

|      |      |        |
|------|------|--------|
| 429  | 449  | 0.6937 |
| 2857 | 2877 | 0.6932 |
| 441  | 461  | 0.6929 |
| 1218 | 1238 | 0.6928 |
| 3135 | 3155 | 0.6928 |
| 1219 | 1239 | 0.6926 |
| 424  | 444  | 0.6924 |
| 430  | 450  | 0.6924 |
| 252  | 272  | 0.6923 |
| 254  | 274  | 0.6922 |
| 253  | 273  | 0.6922 |
| 2166 | 2186 | 0.6918 |
| 1453 | 1473 | 0.6916 |
| 2174 | 2194 | 0.6916 |
| 256  | 276  | 0.6915 |
| 1445 | 1465 | 0.6915 |
| 255  | 275  | 0.6914 |
| 1450 | 1470 | 0.6911 |
| 1439 | 1459 | 0.6904 |
| 440  | 460  | 0.6900 |
| 438  | 458  | 0.6899 |
| 439  | 459  | 0.6899 |
| 1647 | 1667 | 0.6897 |
| 447  | 467  | 0.6893 |
| 444  | 464  | 0.6892 |
| 445  | 465  | 0.6892 |
| 2764 | 2784 | 0.6888 |
| 603  | 623  | 0.6875 |
| 600  | 620  | 0.6874 |
| 1633 | 1653 | 0.6871 |
| 1427 | 1447 | 0.6870 |
| 1430 | 1450 | 0.6870 |
| 1429 | 1449 | 0.6870 |
| 99   | 119  | 0.6869 |
| 2180 | 2200 | 0.6869 |
| 1212 | 1232 | 0.6867 |
| 1434 | 1454 | 0.6865 |
| 98   | 118  | 0.6864 |
| 1178 | 1198 | 0.6862 |
| 2094 | 2114 | 0.6859 |
| 2095 | 2115 | 0.6849 |
| 855  | 875  | 0.6848 |
| 856  | 876  | 0.6847 |
| 2099 | 2119 | 0.6847 |
| 858  | 878  | 0.6847 |
| 857  | 877  | 0.6847 |
| 853  | 873  | 0.6847 |
| 91   | 111  | 0.6833 |
| 864  | 884  | 0.6831 |
| 87   | 107  | 0.6830 |
| 866  | 886  | 0.6830 |
| 867  | 887  | 0.6821 |
| 1437 | 1457 | 0.6813 |
| 1435 | 1455 | 0.6813 |
| 1333 | 1353 | 0.6801 |
| 251  | 271  | 0.6793 |

|      |      |        |
|------|------|--------|
| 250  | 270  | 0.6793 |
| 1125 | 1145 | 0.6793 |
| 1446 | 1466 | 0.6789 |
| 1449 | 1469 | 0.6786 |
| 1438 | 1458 | 0.6779 |
| 1131 | 1151 | 0.6774 |
| 437  | 457  | 0.6773 |
| 625  | 645  | 0.6770 |
| 446  | 466  | 0.6768 |
| 2760 | 2780 | 0.6765 |
| 1220 | 1240 | 0.6764 |
| 2756 | 2776 | 0.6758 |
| 1401 | 1421 | 0.6750 |
| 2264 | 2284 | 0.6750 |
| 95   | 115  | 0.6746 |
| 1632 | 1652 | 0.6746 |
| 1431 | 1451 | 0.6746 |
| 1635 | 1655 | 0.6745 |
| 2179 | 2199 | 0.6744 |
| 2178 | 2198 | 0.6744 |
| 96   | 116  | 0.6744 |
| 2177 | 2197 | 0.6744 |
| 1637 | 1657 | 0.6744 |
| 2176 | 2196 | 0.6743 |
| 1423 | 1443 | 0.6743 |
| 1422 | 1442 | 0.6742 |
| 2175 | 2195 | 0.6742 |
| 1433 | 1453 | 0.6739 |
| 3134 | 3154 | 0.6731 |
| 2098 | 2118 | 0.6720 |
| 604  | 624  | 0.6716 |
| 2864 | 2884 | 0.6709 |
| 88   | 108  | 0.6708 |
| 89   | 109  | 0.6708 |
| 431  | 451  | 0.6705 |
| 432  | 452  | 0.6705 |
| 1180 | 1200 | 0.6697 |
| 3113 | 3133 | 0.6687 |
| 2096 | 2116 | 0.6684 |
| 2858 | 2878 | 0.6683 |
| 2097 | 2117 | 0.6682 |
| 1332 | 1352 | 0.6676 |
| 1454 | 1474 | 0.6666 |
| 249  | 269  | 0.6665 |
| 1129 | 1149 | 0.6664 |
| 1128 | 1148 | 0.6657 |
| 1127 | 1147 | 0.6657 |
| 1126 | 1146 | 0.6657 |
| 246  | 266  | 0.6650 |
| 1646 | 1666 | 0.6650 |
| 436  | 456  | 0.6650 |
| 2759 | 2779 | 0.6634 |
| 2758 | 2778 | 0.6634 |
| 2245 | 2265 | 0.6623 |
| 1428 | 1448 | 0.6620 |
| 92   | 112  | 0.6617 |

|      |      |        |
|------|------|--------|
| 1242 | 1262 | 0.6617 |
| 1243 | 1263 | 0.6613 |
| 1432 | 1452 | 0.6613 |
| 1132 | 1152 | 0.6611 |
| 1133 | 1153 | 0.6609 |
| 1179 | 1199 | 0.6608 |
| 1252 | 1272 | 0.6603 |
| 1251 | 1271 | 0.6600 |
| 854  | 874  | 0.6597 |
| 605  | 625  | 0.6591 |
| 1134 | 1154 | 0.6589 |
| 1248 | 1268 | 0.6584 |
| 1247 | 1267 | 0.6583 |
| 1176 | 1196 | 0.6573 |
| 1177 | 1197 | 0.6572 |
| 1436 | 1456 | 0.6562 |
| 1331 | 1351 | 0.6551 |
| 624  | 644  | 0.6525 |
| 2757 | 2777 | 0.6509 |
| 1402 | 1422 | 0.6504 |
| 1254 | 1274 | 0.6504 |
| 611  | 631  | 0.6499 |
| 1221 | 1241 | 0.6499 |
| 1416 | 1436 | 0.6496 |
| 94   | 114  | 0.6496 |
| 1414 | 1434 | 0.6496 |
| 612  | 632  | 0.6496 |
| 1638 | 1658 | 0.6495 |
| 93   | 113  | 0.6494 |
| 1421 | 1441 | 0.6494 |
| 1245 | 1265 | 0.6481 |
| 1253 | 1273 | 0.6478 |
| 1137 | 1157 | 0.6458 |
| 1246 | 1266 | 0.6458 |
| 433  | 453  | 0.6455 |
| 1168 | 1188 | 0.6454 |
| 610  | 630  | 0.6452 |
| 1169 | 1189 | 0.6449 |
| 1175 | 1195 | 0.6448 |
| 1172 | 1192 | 0.6443 |
| 1174 | 1194 | 0.6435 |
| 1330 | 1350 | 0.6425 |
| 1130 | 1150 | 0.6420 |
| 248  | 268  | 0.6409 |
| 623  | 643  | 0.6402 |
| 435  | 455  | 0.6400 |
| 247  | 267  | 0.6400 |
| 1645 | 1665 | 0.6398 |
| 1255 | 1275 | 0.6373 |
| 1410 | 1430 | 0.6373 |
| 1413 | 1433 | 0.6372 |
| 613  | 633  | 0.6371 |
| 1640 | 1660 | 0.6369 |
| 1260 | 1280 | 0.6364 |
| 1244 | 1264 | 0.6362 |
| 1408 | 1428 | 0.6352 |

|      |      |        |
|------|------|--------|
| 1139 | 1159 | 0.6345 |
| 1642 | 1662 | 0.6343 |
| 1135 | 1155 | 0.6339 |
| 1166 | 1186 | 0.6335 |
| 1249 | 1269 | 0.6334 |
| 1138 | 1158 | 0.6331 |
| 1170 | 1190 | 0.6323 |
| 1173 | 1193 | 0.6319 |
| 1301 | 1321 | 0.6310 |
| 1403 | 1423 | 0.6309 |
| 1404 | 1424 | 0.6309 |
| 434  | 454  | 0.6306 |
| 619  | 639  | 0.6284 |
| 620  | 640  | 0.6284 |
| 622  | 642  | 0.6278 |
| 2246 | 2266 | 0.6258 |
| 1222 | 1242 | 0.6255 |
| 2263 | 2283 | 0.6250 |
| 1256 | 1276 | 0.6248 |
| 1412 | 1432 | 0.6248 |
| 1409 | 1429 | 0.6248 |
| 1241 | 1261 | 0.6248 |
| 1419 | 1439 | 0.6247 |
| 1420 | 1440 | 0.6247 |
| 1415 | 1435 | 0.6246 |
| 1418 | 1438 | 0.6246 |
| 1417 | 1437 | 0.6246 |
| 1639 | 1659 | 0.6244 |
| 3133 | 3153 | 0.6231 |
| 1250 | 1270 | 0.6225 |
| 1407 | 1427 | 0.6218 |
| 1641 | 1661 | 0.6218 |
| 1406 | 1426 | 0.6218 |
| 606  | 626  | 0.6216 |
| 1136 | 1156 | 0.6215 |
| 1140 | 1160 | 0.6210 |
| 1287 | 1307 | 0.6209 |
| 1171 | 1191 | 0.6208 |
| 1143 | 1163 | 0.6206 |
| 609  | 629  | 0.6202 |
| 1167 | 1187 | 0.6201 |
| 3114 | 3134 | 0.6188 |
| 614  | 634  | 0.6172 |
| 615  | 635  | 0.6169 |
| 616  | 636  | 0.6169 |
| 618  | 638  | 0.6166 |
| 621  | 641  | 0.6158 |
| 1643 | 1663 | 0.6148 |
| 1644 | 1664 | 0.6147 |
| 1411 | 1431 | 0.6123 |
| 1144 | 1164 | 0.6121 |
| 1259 | 1279 | 0.6119 |
| 1146 | 1166 | 0.6119 |
| 1258 | 1278 | 0.6119 |
| 1299 | 1319 | 0.6118 |
| 1300 | 1320 | 0.6118 |

|      |      |        |
|------|------|--------|
| 1261 | 1281 | 0.6114 |
| 1297 | 1317 | 0.6112 |
| 1298 | 1318 | 0.6110 |
| 1405 | 1425 | 0.6093 |
| 607  | 627  | 0.6090 |
| 1142 | 1162 | 0.6085 |
| 1141 | 1161 | 0.6085 |
| 1165 | 1185 | 0.6083 |
| 1288 | 1308 | 0.6083 |
| 1290 | 1310 | 0.6077 |
| 1239 | 1259 | 0.6069 |
| 1329 | 1349 | 0.6050 |
| 617  | 637  | 0.6043 |
| 3115 | 3135 | 0.6042 |
| 1286 | 1306 | 0.6015 |
| 1156 | 1176 | 0.6014 |
| 1224 | 1244 | 0.6010 |
| 1223 | 1243 | 0.6009 |
| 1147 | 1167 | 0.6003 |
| 1162 | 1182 | 0.5998 |
| 1145 | 1165 | 0.5998 |
| 1257 | 1277 | 0.5998 |
| 2247 | 2267 | 0.5998 |
| 1160 | 1180 | 0.5992 |
| 1159 | 1179 | 0.5981 |
| 1240 | 1260 | 0.5981 |
| 1289 | 1309 | 0.5956 |
| 1291 | 1311 | 0.5951 |
| 1296 | 1316 | 0.5946 |
| 1302 | 1322 | 0.5945 |
| 1238 | 1258 | 0.5943 |
| 1157 | 1177 | 0.5895 |
| 1154 | 1174 | 0.5889 |
| 1155 | 1175 | 0.5889 |
| 1150 | 1170 | 0.5874 |
| 1153 | 1173 | 0.5868 |
| 1161 | 1181 | 0.5867 |
| 3131 | 3151 | 0.5862 |
| 3132 | 3152 | 0.5856 |
| 1262 | 1282 | 0.5850 |
| 1284 | 1304 | 0.5841 |
| 608  | 628  | 0.5839 |
| 1164 | 1184 | 0.5833 |
| 1237 | 1257 | 0.5819 |
| 3116 | 3136 | 0.5791 |
| 1303 | 1323 | 0.5784 |
| 1274 | 1294 | 0.5777 |
| 1225 | 1245 | 0.5760 |
| 1163 | 1183 | 0.5754 |
| 1149 | 1169 | 0.5750 |
| 2262 | 2282 | 0.5750 |
| 1148 | 1168 | 0.5750 |
| 1152 | 1172 | 0.5742 |
| 1151 | 1171 | 0.5740 |
| 1264 | 1284 | 0.5734 |
| 1158 | 1178 | 0.5731 |

|      |      |        |
|------|------|--------|
| 1263 | 1283 | 0.5731 |
| 1285 | 1305 | 0.5720 |
| 1283 | 1303 | 0.5719 |
| 1292 | 1312 | 0.5701 |
| 1293 | 1313 | 0.5699 |
| 1295 | 1315 | 0.5696 |
| 1269 | 1289 | 0.5683 |
| 1268 | 1288 | 0.5681 |
| 1273 | 1293 | 0.5677 |
| 1327 | 1347 | 0.5675 |
| 1328 | 1348 | 0.5675 |
| 1272 | 1292 | 0.5675 |
| 1304 | 1324 | 0.5659 |
| 1305 | 1325 | 0.5655 |
| 1275 | 1295 | 0.5655 |
| 1226 | 1246 | 0.5635 |
| 1229 | 1249 | 0.5634 |
| 1233 | 1253 | 0.5629 |
| 1232 | 1252 | 0.5624 |
| 1230 | 1250 | 0.5624 |
| 2248 | 2268 | 0.5623 |
| 1265 | 1285 | 0.5616 |
| 3130 | 3150 | 0.5612 |
| 1266 | 1286 | 0.5594 |
| 1294 | 1314 | 0.5572 |
| 1236 | 1256 | 0.5569 |
| 1271 | 1291 | 0.5553 |
| 1270 | 1290 | 0.5553 |
| 1276 | 1296 | 0.5530 |
| 3117 | 3137 | 0.5518 |
| 1228 | 1248 | 0.5509 |
| 1235 | 1255 | 0.5506 |
| 1231 | 1251 | 0.5499 |
| 1315 | 1335 | 0.5476 |
| 1316 | 1336 | 0.5476 |
| 1313 | 1333 | 0.5475 |
| 1312 | 1332 | 0.5475 |
| 1282 | 1302 | 0.5475 |
| 1309 | 1329 | 0.5471 |
| 1267 | 1287 | 0.5431 |
| 1277 | 1297 | 0.5405 |
| 1306 | 1326 | 0.5405 |
| 1279 | 1299 | 0.5404 |
| 1326 | 1346 | 0.5397 |
| 1227 | 1247 | 0.5385 |
| 1234 | 1254 | 0.5378 |
| 2261 | 2281 | 0.5376 |
| 3129 | 3149 | 0.5363 |
| 1314 | 1334 | 0.5352 |
| 1310 | 1330 | 0.5350 |
| 1311 | 1331 | 0.5350 |
| 1318 | 1338 | 0.5349 |
| 1308 | 1328 | 0.5346 |
| 1317 | 1337 | 0.5309 |
| 2249 | 2269 | 0.5305 |
| 1278 | 1298 | 0.5286 |

|      |      |        |
|------|------|--------|
| 1280 | 1300 | 0.5284 |
| 3118 | 3138 | 0.5266 |
| 3128 | 3148 | 0.5238 |
| 1325 | 1345 | 0.5238 |
| 1319 | 1339 | 0.5224 |
| 1307 | 1327 | 0.5220 |
| 1281 | 1301 | 0.5217 |
| 2250 | 2270 | 0.5180 |
| 3127 | 3147 | 0.5143 |
| 3119 | 3139 | 0.5127 |
| 2260 | 2280 | 0.5126 |
| 1320 | 1340 | 0.5099 |
| 1322 | 1342 | 0.5095 |
| 2251 | 2271 | 0.5054 |
| 1323 | 1343 | 0.5005 |
| 1324 | 1344 | 0.5003 |
| 3120 | 3140 | 0.5002 |
| 2258 | 2278 | 0.4986 |
| 1321 | 1341 | 0.4973 |
| 2257 | 2277 | 0.4853 |
| 2256 | 2276 | 0.4853 |
| 3123 | 3143 | 0.4835 |
| 3124 | 3144 | 0.4832 |
| 3126 | 3146 | 0.4768 |
| 3125 | 3145 | 0.4767 |
| 2259 | 2279 | 0.4758 |
| 2254 | 2274 | 0.4727 |
| 2253 | 2273 | 0.4727 |
| 2255 | 2275 | 0.4727 |
| 2252 | 2272 | 0.4726 |
| 3122 | 3142 | 0.4636 |
| 3121 | 3141 | 0.4635 |



**Supplementary Figure:**

**Clustal Omega alignment of most frequent sequences of each virus identified on Weblogos (Figure 2c).**

|      |                        |    |
|------|------------------------|----|
| DV1  | VVVLGSQEGAMHTALTGATEI  | 21 |
| DV2  | VVVLGSQEGAMHTALTGATEI  | 21 |
| DV3  | VVVLGSQEGAMHTALTGATEI  | 21 |
| DV4  | VTVLGSQEGAMHSALAGATEV  | 21 |
| JEV  | VVALGSQEGGLHQALAGAIIV  | 21 |
| TBEV | VYNLGDQTGVLLKSLAGVPVA  | 21 |
| WNV  | VIALGSQEGALHQALAGAIIPV | 21 |
| YFV  | VLALGNQEGSLKTALTGAMRV  | 21 |
| ZKV  | VVVLGSQEGAVHTALAGALEA  | 21 |

\* \*\*.\* \* : :\*:\*. .
